# Supplementary material for: An Efficient Synthesis of Oxygen-Bridged Spirooxindoles via Microwave-Promoted Multicomponent Reaction
Source: MDPI journal article supplement (doi:10.3390/molecules28083508), 2023-04-16
Supplement: s1 [file s1]

*Supporting Information*

**An Efficient Synthesis of Oxygen-bridged Spirooxindoles via  
Microwave-Promoted Multicomponent Reaction**

Yaojing Shi, Hua Zhao\*, Yufen Zhao

Institute of Drug Discovery Technology, Qian Xuesen Collaborative Research Center of  
Astrochemistry and Space Life Sciences, Ningbo University, Ningbo 315211, Zhejiang,  
China

zhaohua@nbu.edu.cn

# 1. $^1\text{H}$ , $^{13}\text{C}$ and $^{19}\text{F}$ NMR Spectra of Compound

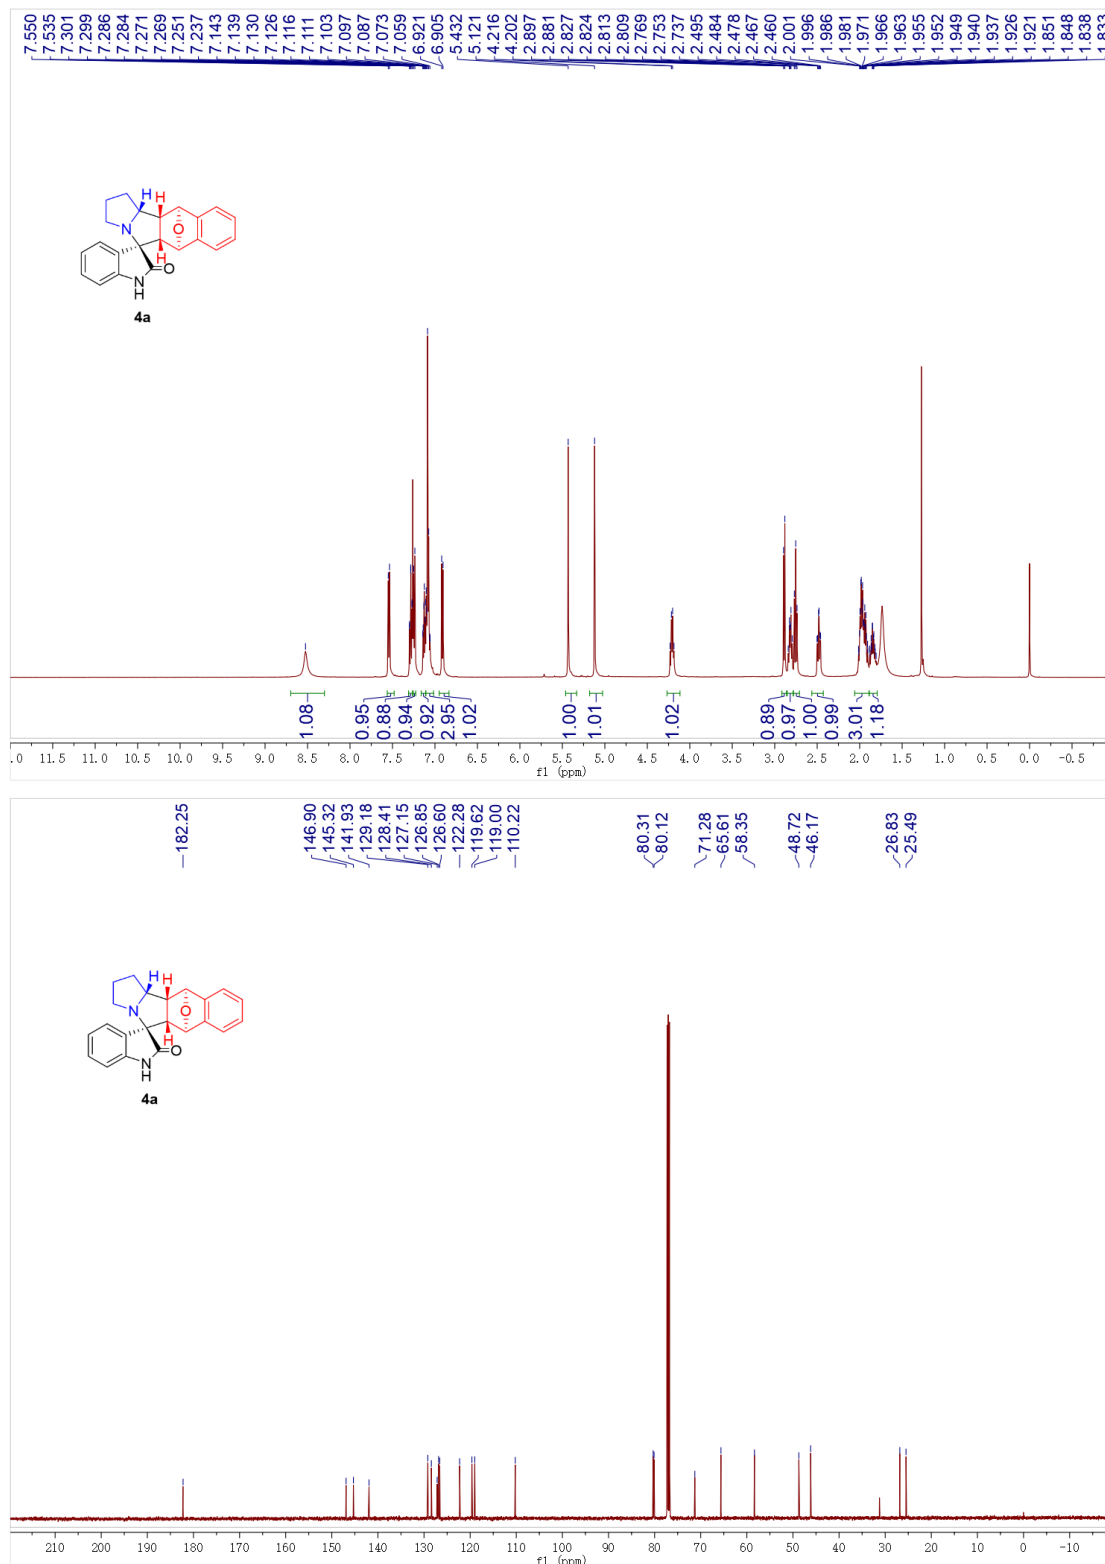

$^1\text{H}$  NMR (500 MHz,  $\text{CDCl}_3$ ),  $^{13}\text{C}$  NMR (125 MHz,  $\text{CDCl}_3$ ) spectrum of **4a**

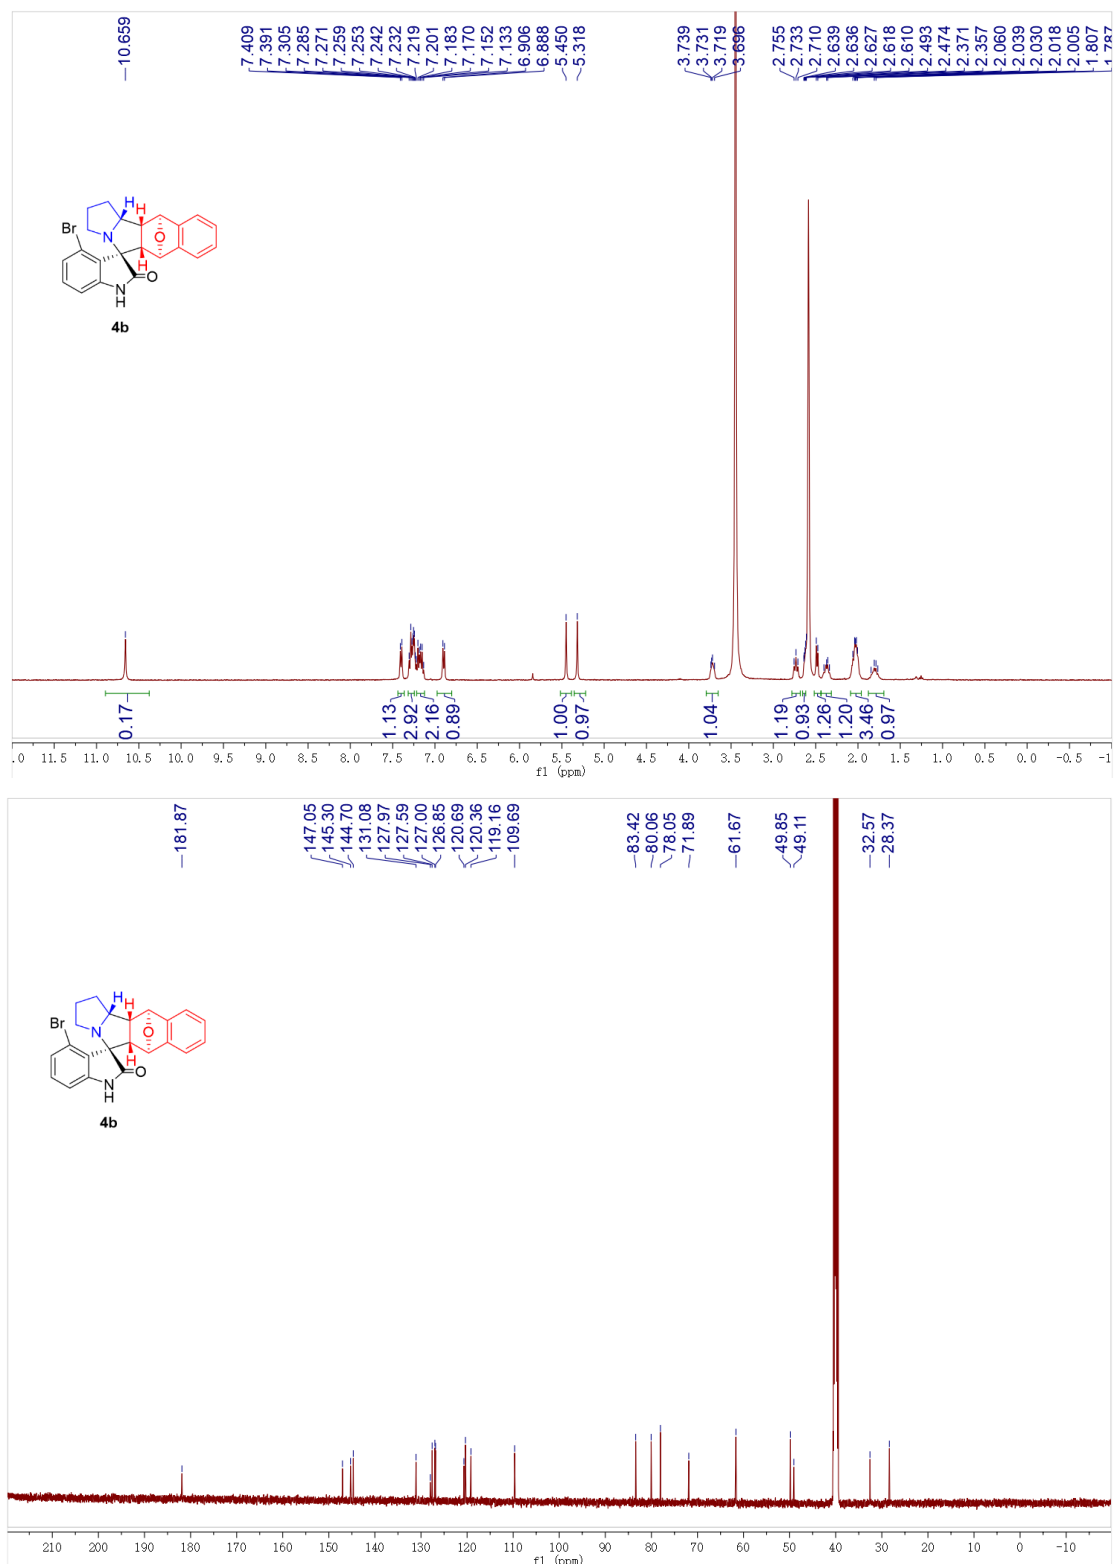

**<sup>1</sup>H NMR (400 MHz, DMSO-*d*<sub>6</sub>), <sup>13</sup>C NMR (125 MHz, DMSO-*d*<sub>6</sub>) spectrum of **4b****

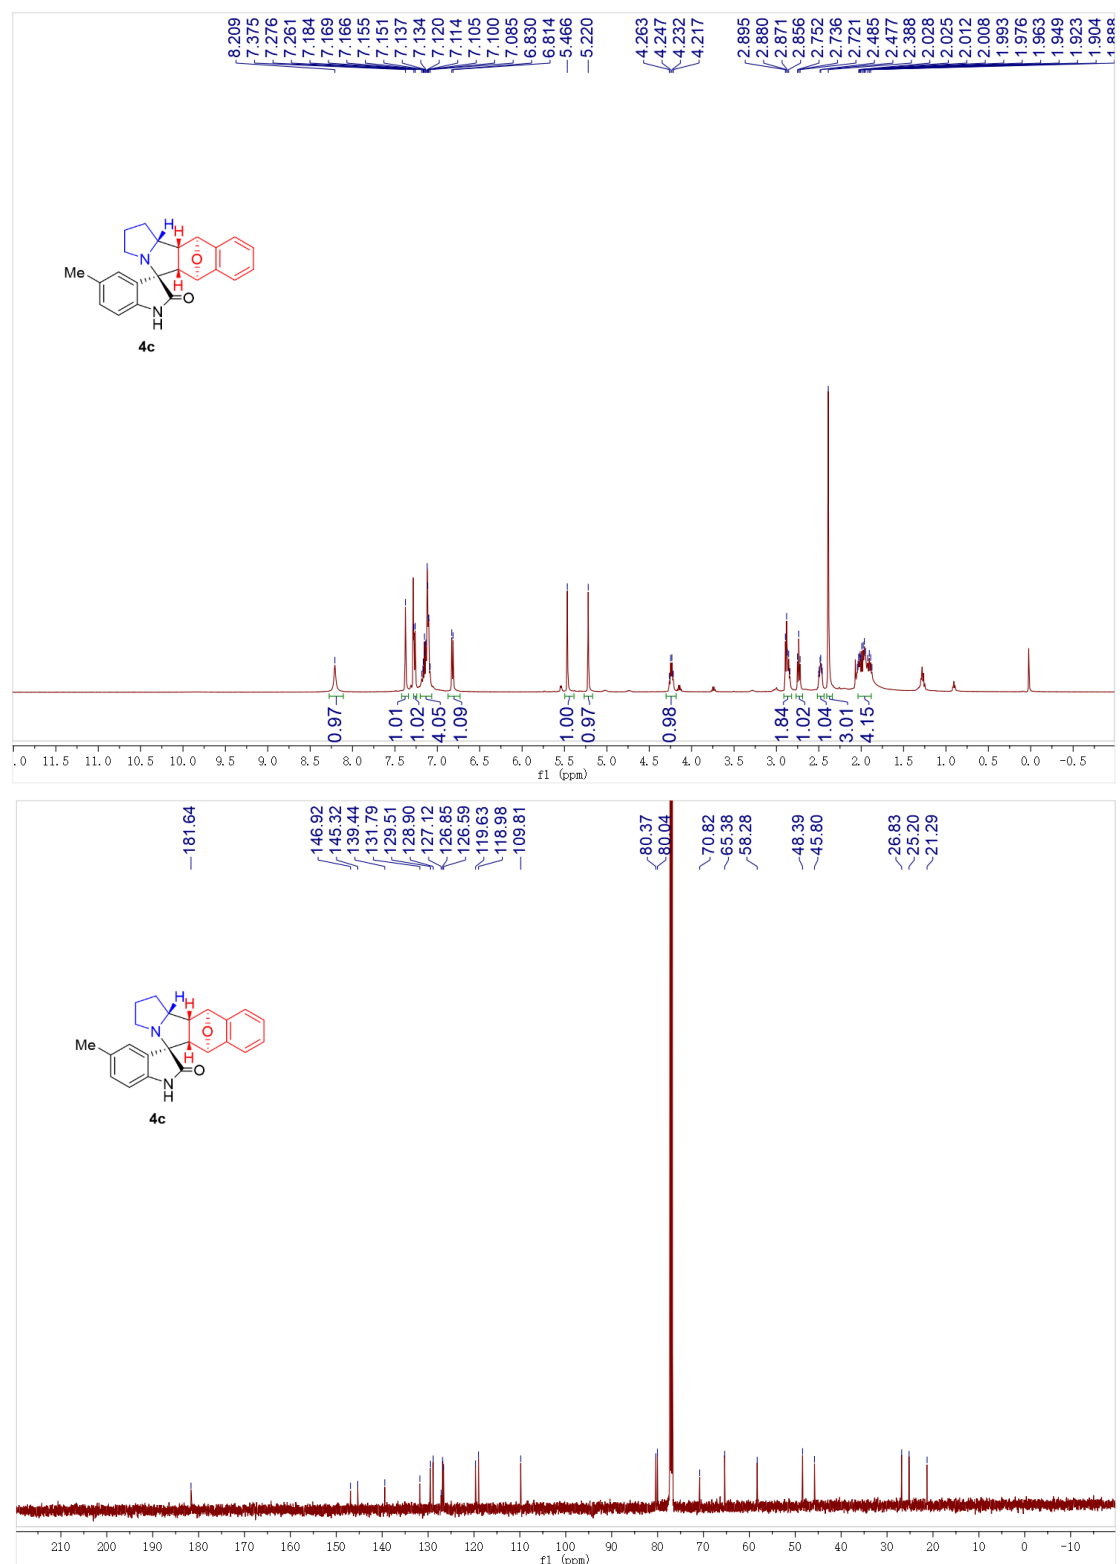

$^1\text{H}$  NMR (500 MHz,  $\text{CDCl}_3$ ),  $^{13}\text{C}$  NMR (125 MHz,  $\text{CDCl}_3$ ) spectrum of **4c**

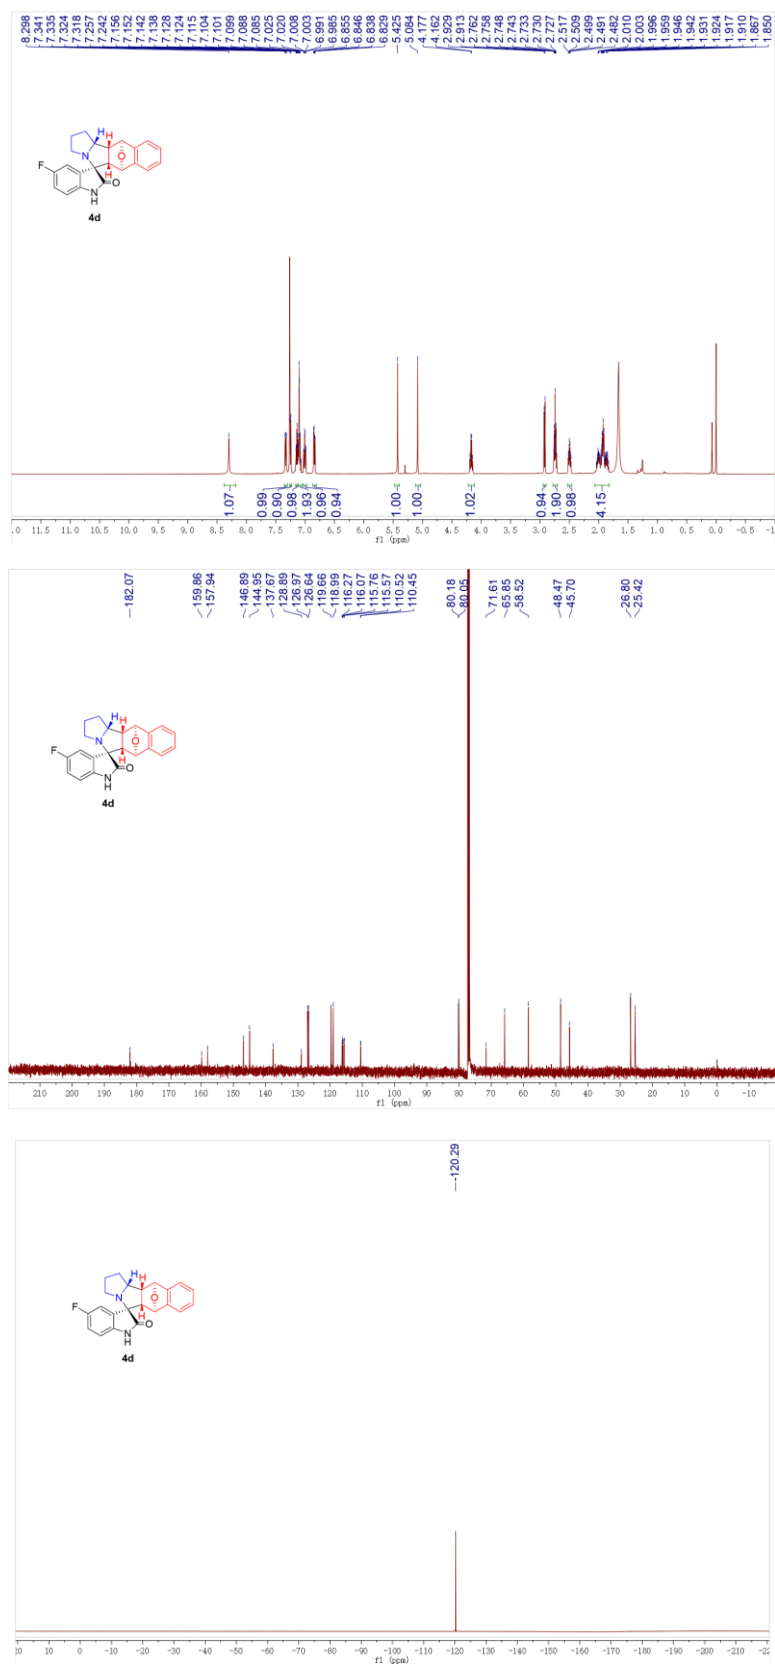

**<sup>1</sup>H NMR (500 MHz, CDCl<sub>3</sub>), <sup>13</sup>C NMR (125 MHz, CDCl<sub>3</sub>) and <sup>19</sup>F NMR (471 MHz, CDCl<sub>3</sub>) spectrum of **4d****

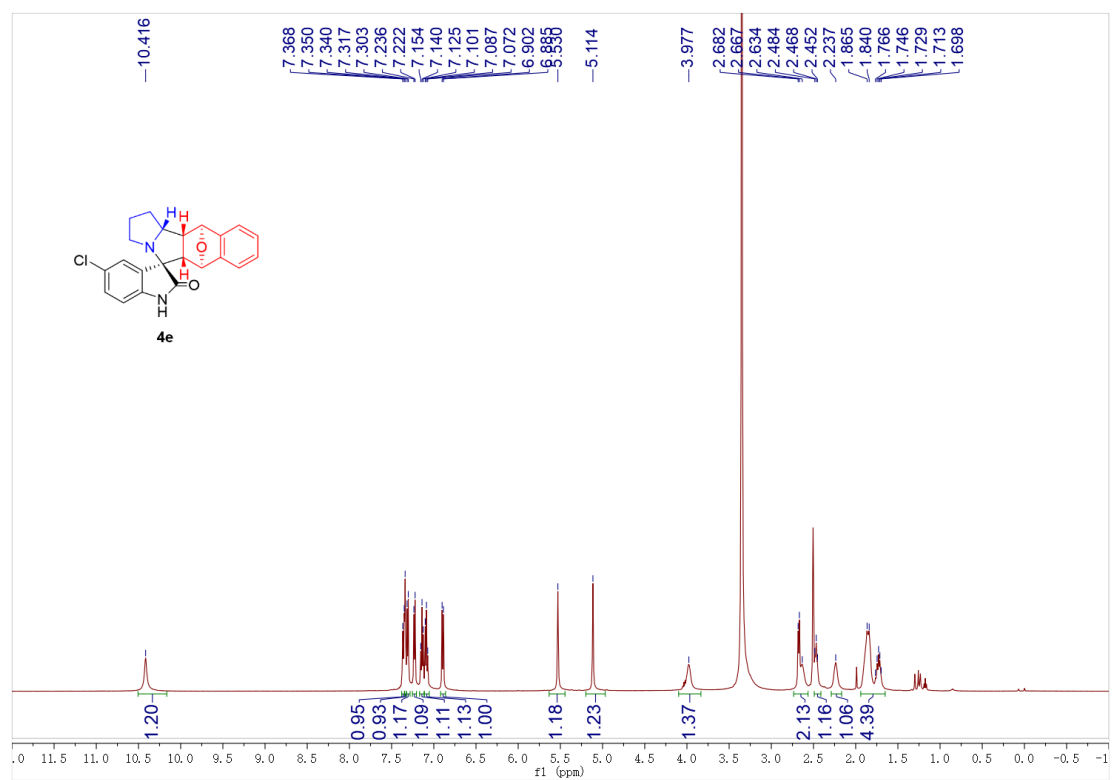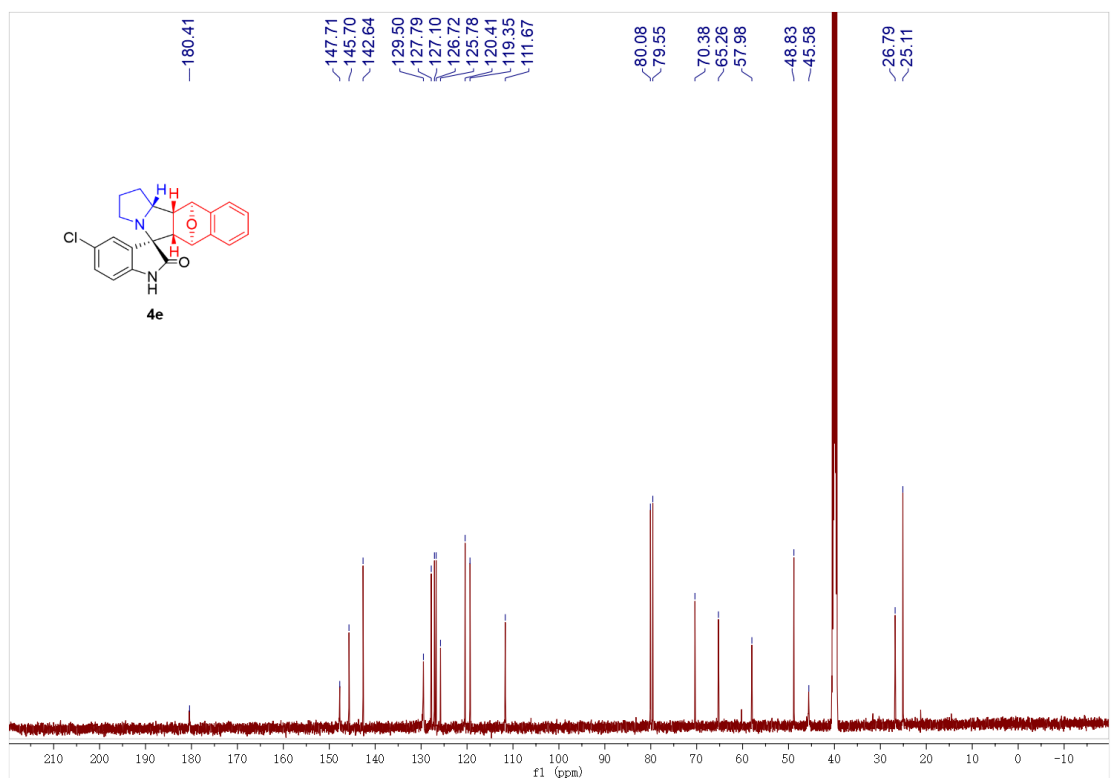

**<sup>1</sup>H NMR (500 MHz, DMSO-*d*<sub>6</sub>), <sup>13</sup>C NMR (125 MHz, DMSO-*d*<sub>6</sub>) spectrum of 4e**

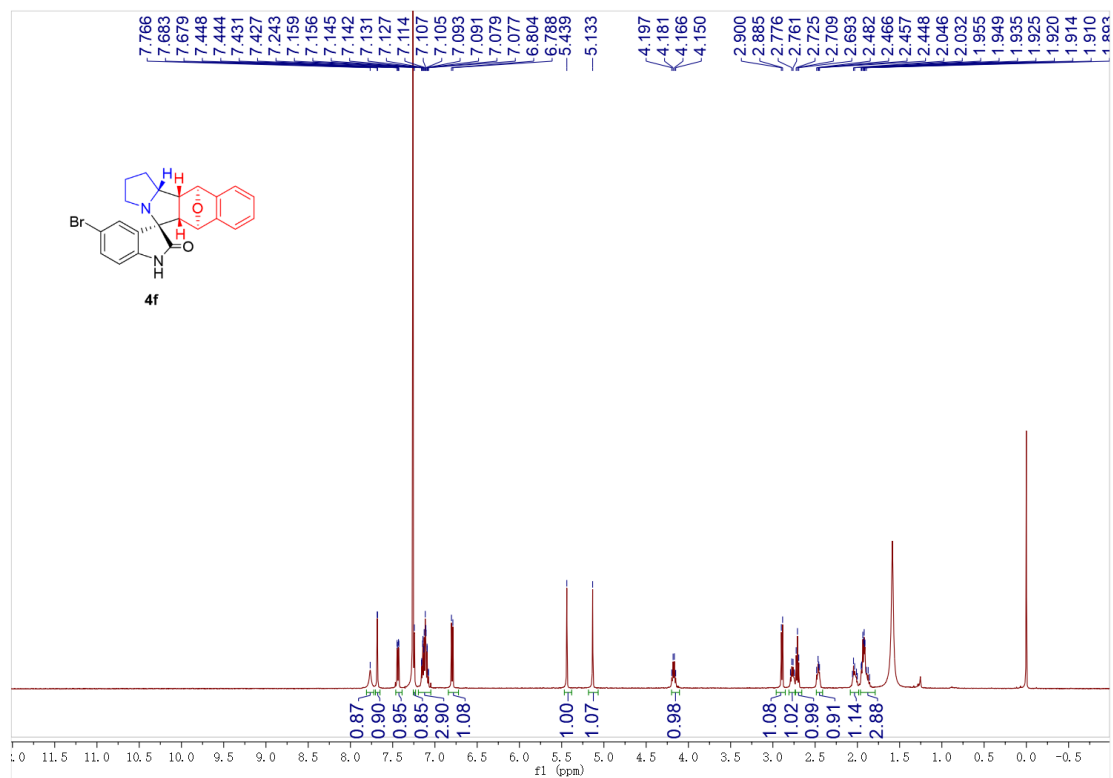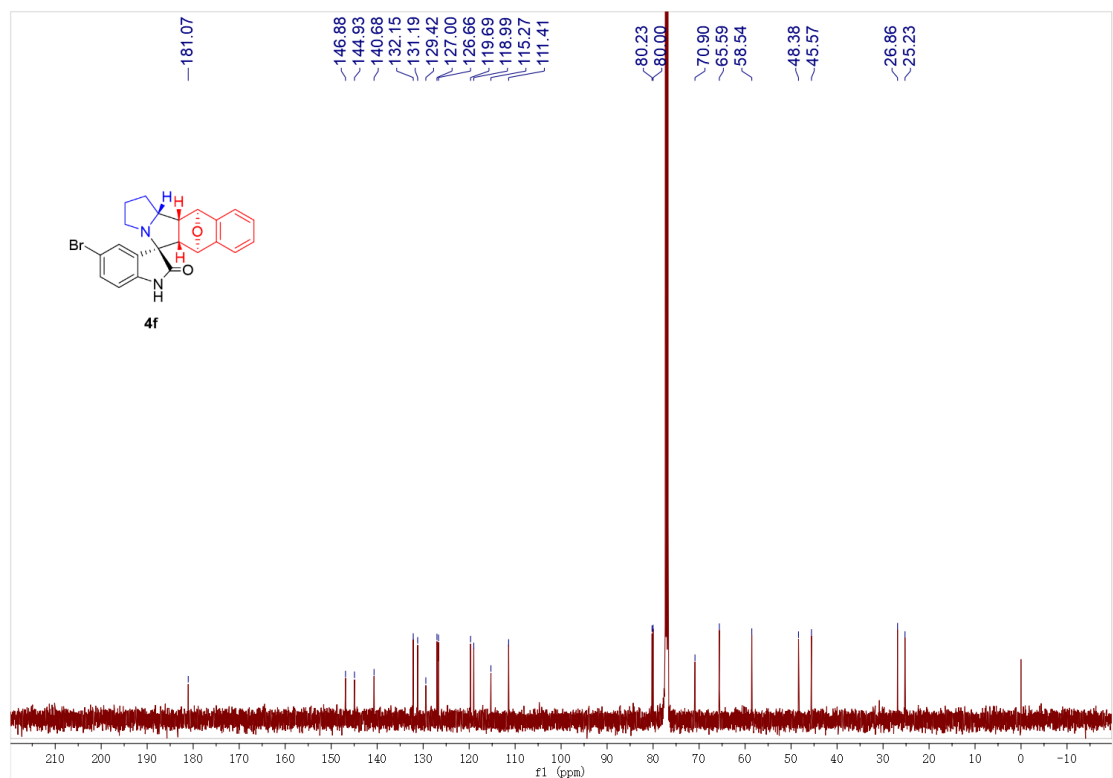

**<sup>1</sup>H NMR (500 MHz, CDCl<sub>3</sub>), <sup>13</sup>C NMR (125 MHz, CDCl<sub>3</sub>) spectrum of 4f**

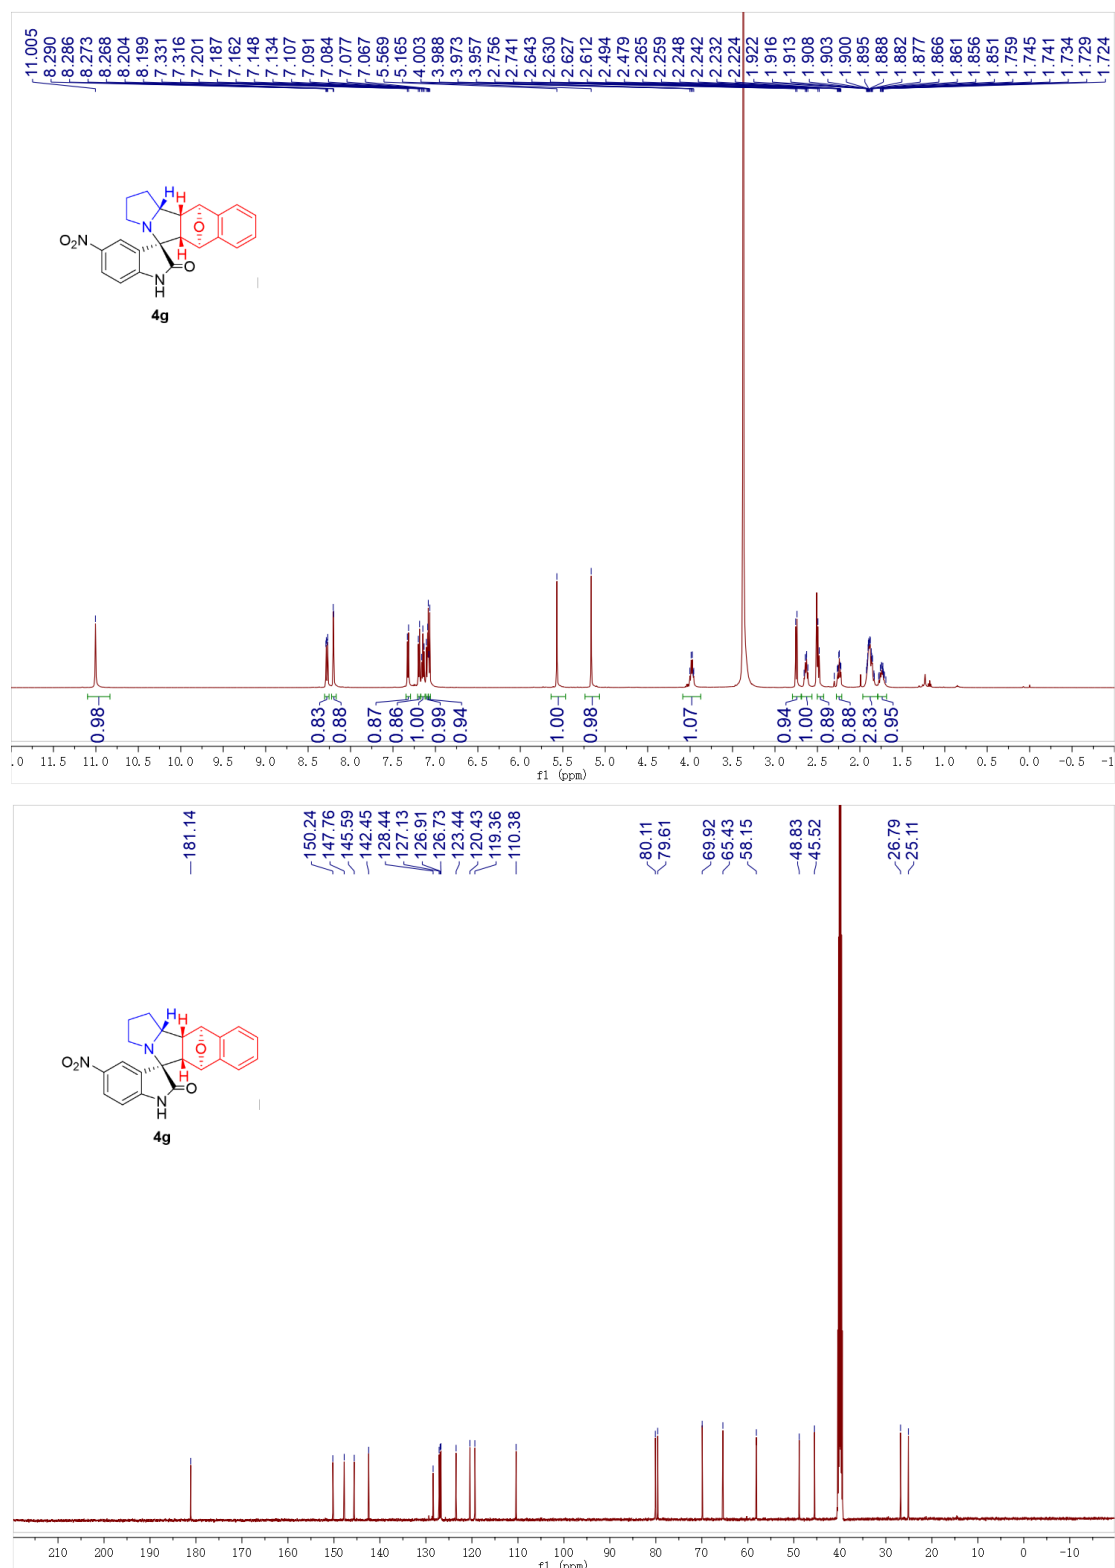

**<sup>1</sup>H NMR (500 MHz, DMSO-*d*<sub>6</sub>), <sup>13</sup>C NMR (125 MHz, DMSO-*d*<sub>6</sub>) spectrum of **4g****



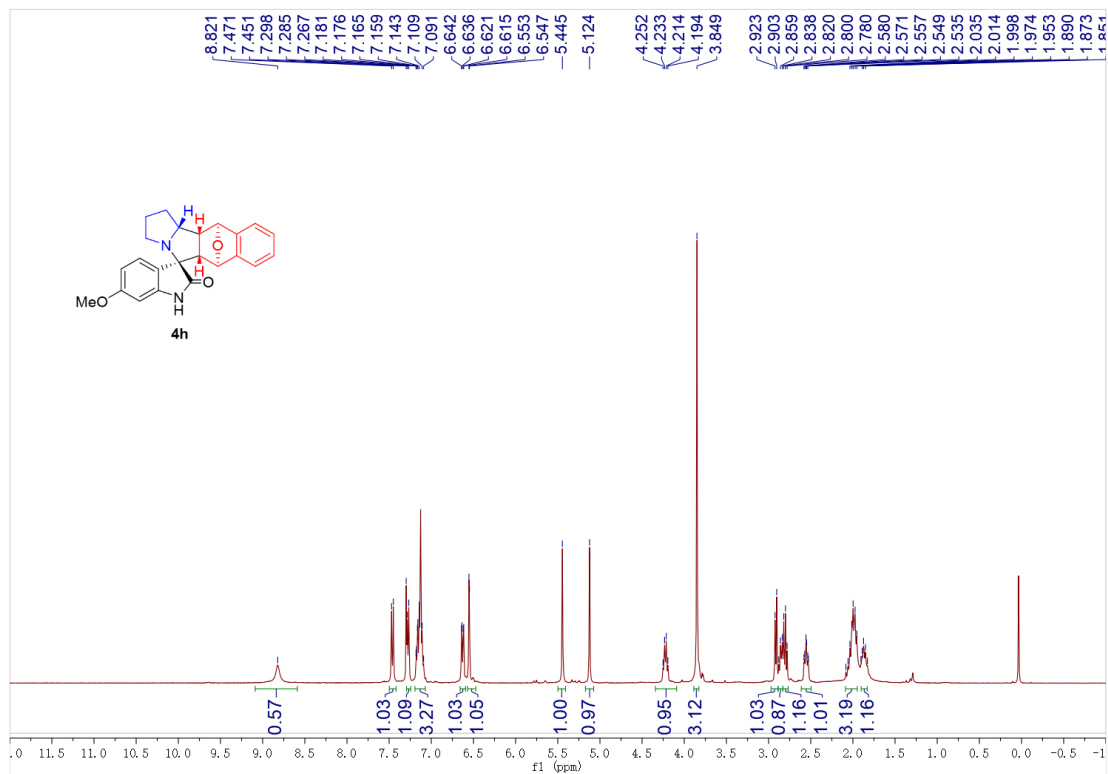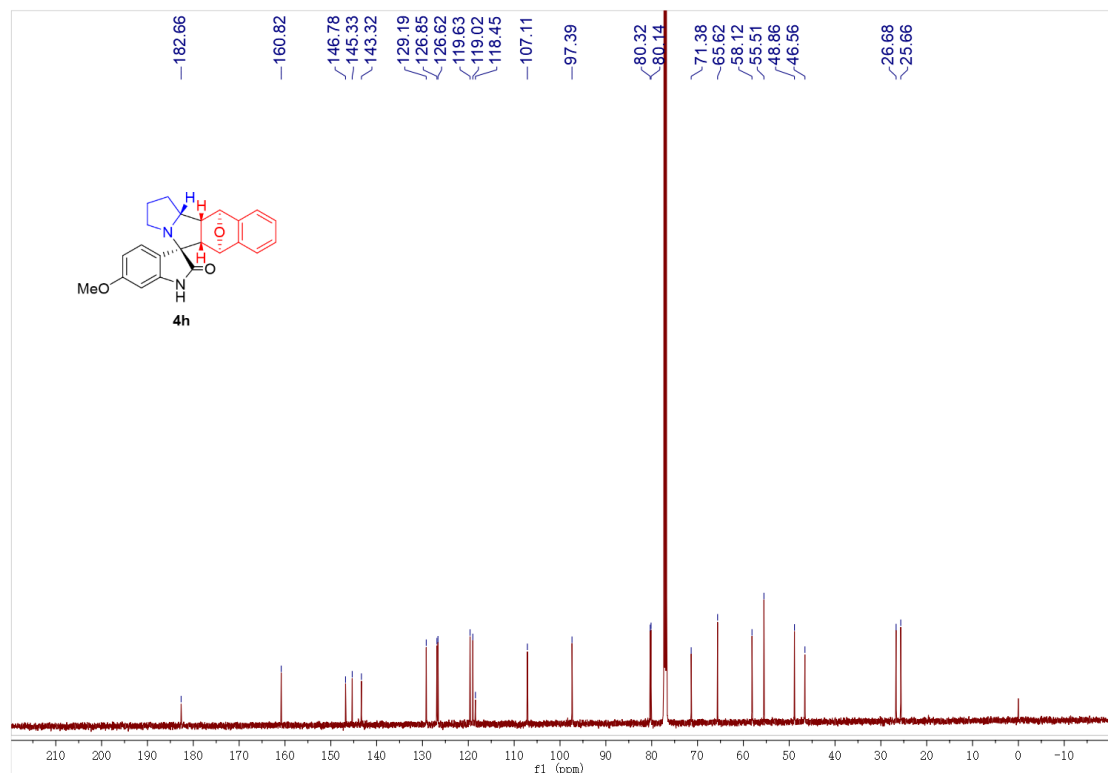

**<sup>1</sup>H NMR (400 MHz, CDCl<sub>3</sub>), <sup>13</sup>C NMR (125 MHz, CDCl<sub>3</sub>) spectrum of 4h**

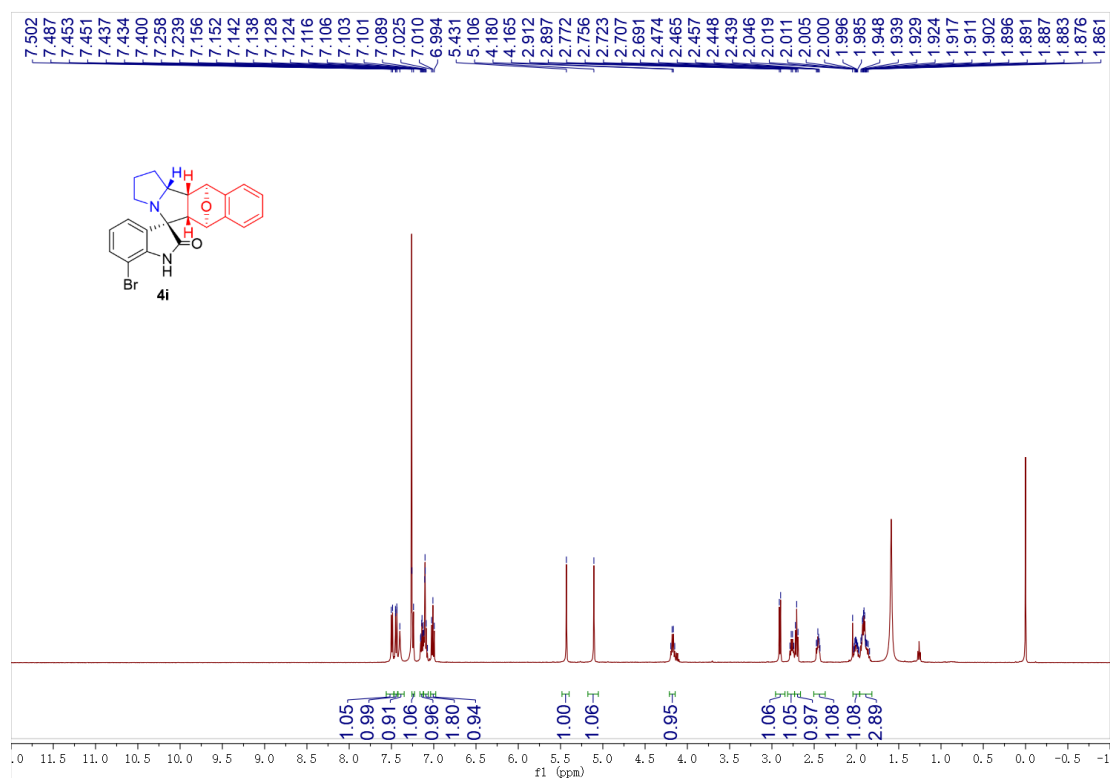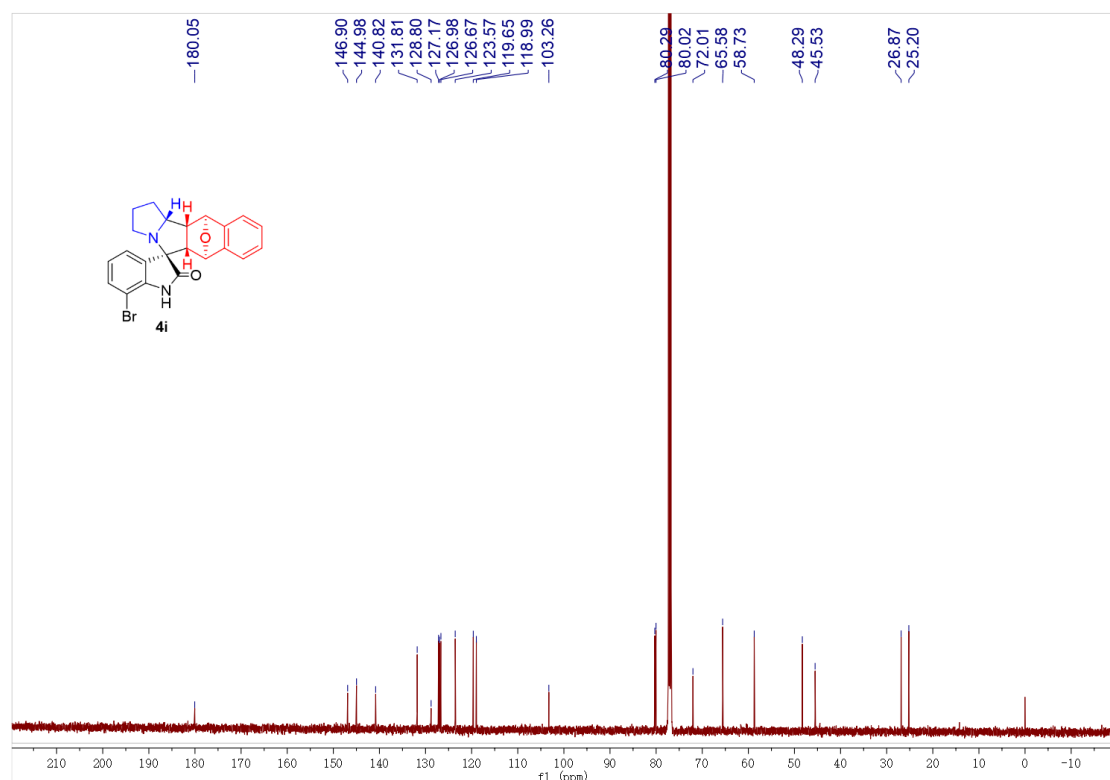

**<sup>1</sup>H NMR (500 MHz, CDCl<sub>3</sub>), <sup>13</sup>C NMR (125 MHz, CDCl<sub>3</sub>) spectrum of 4i**

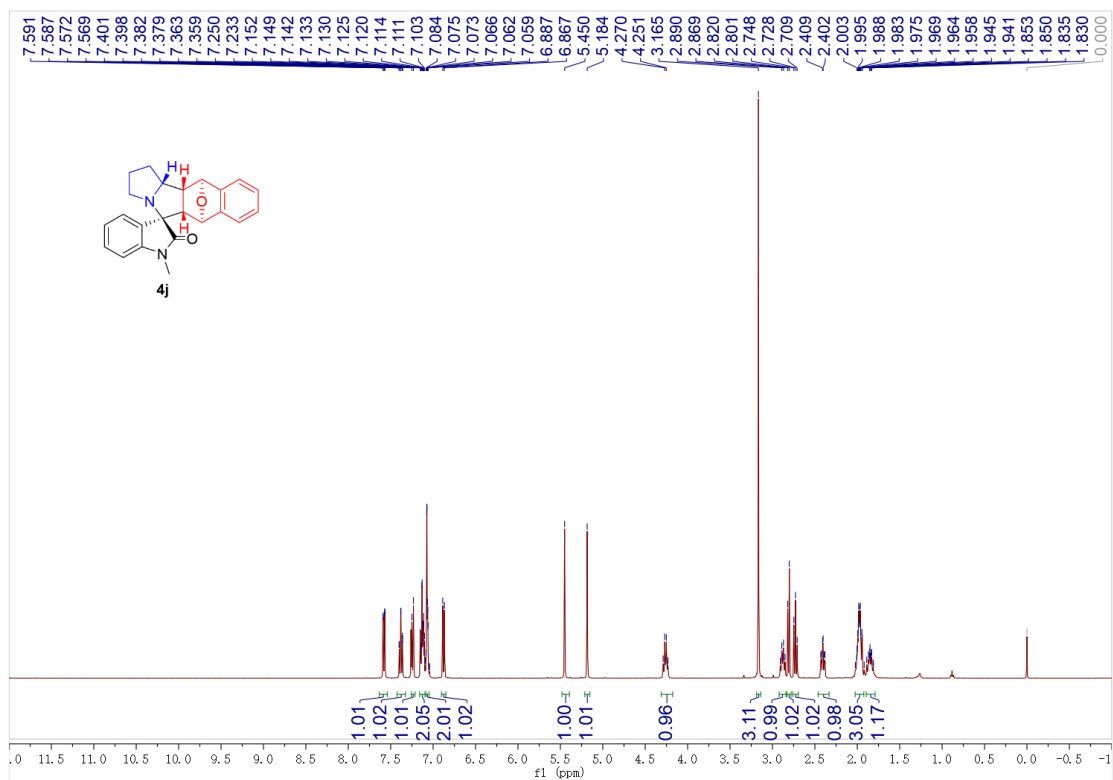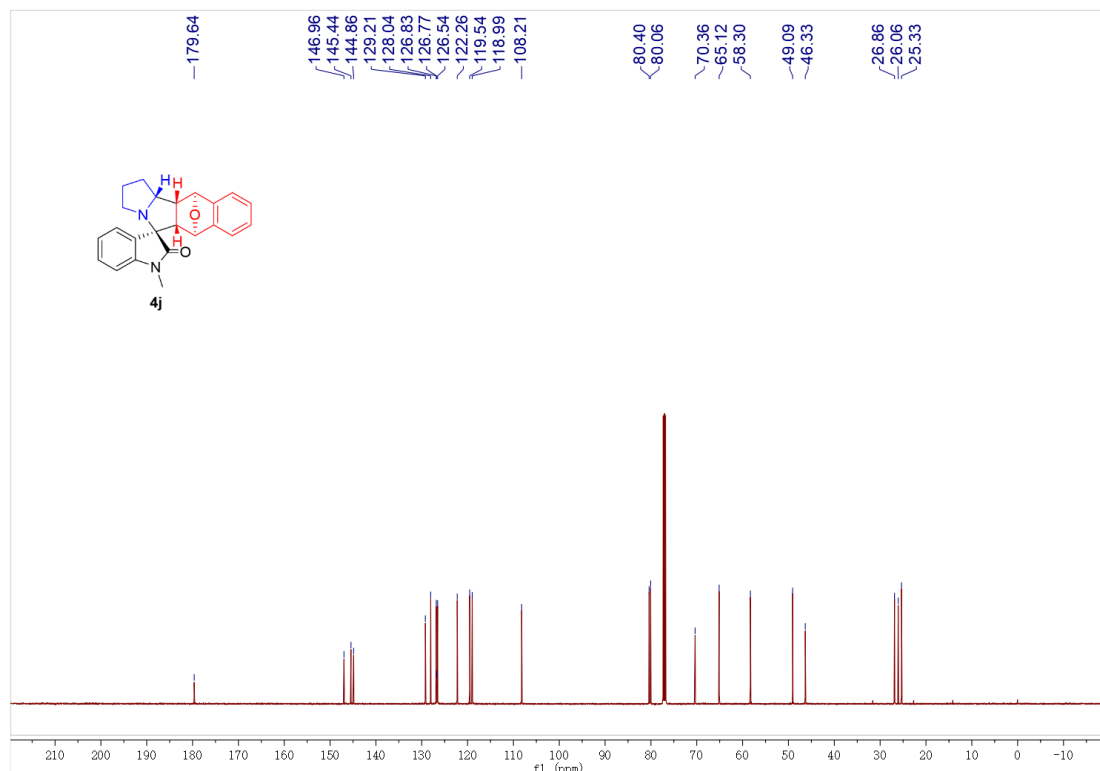

**<sup>1</sup>H NMR (400 MHz, CDCl<sub>3</sub>), <sup>13</sup>C NMR (125 MHz, CDCl<sub>3</sub>) spectrum of 4j**

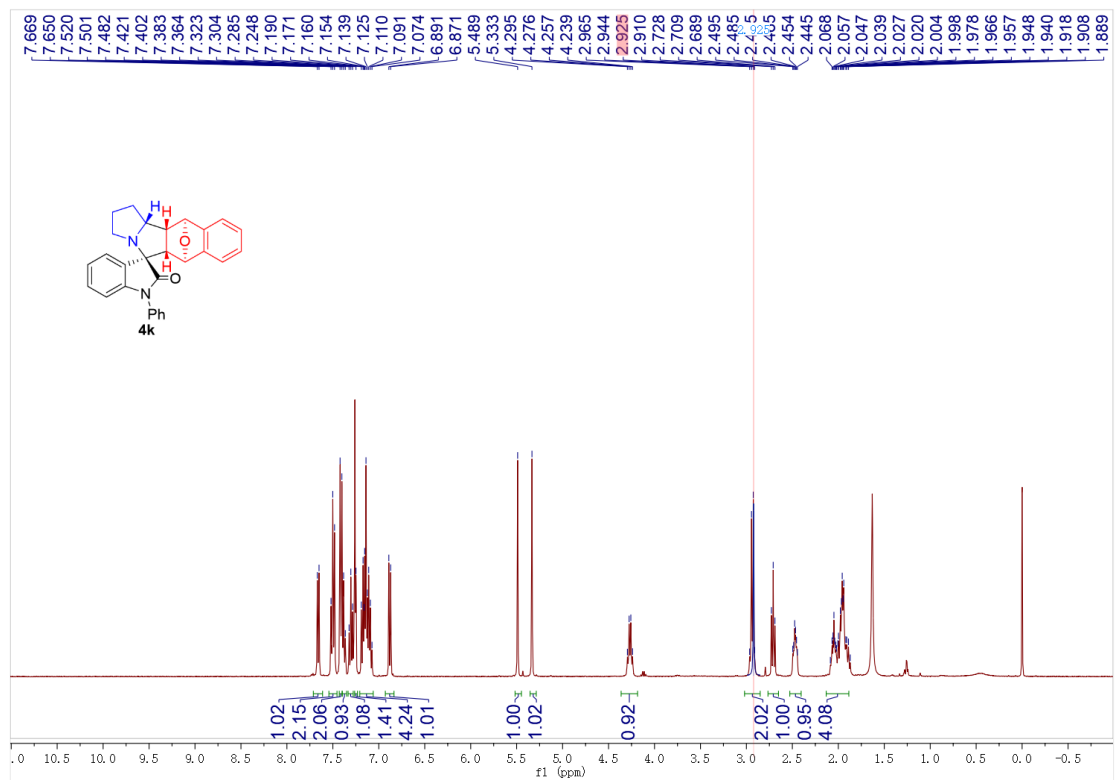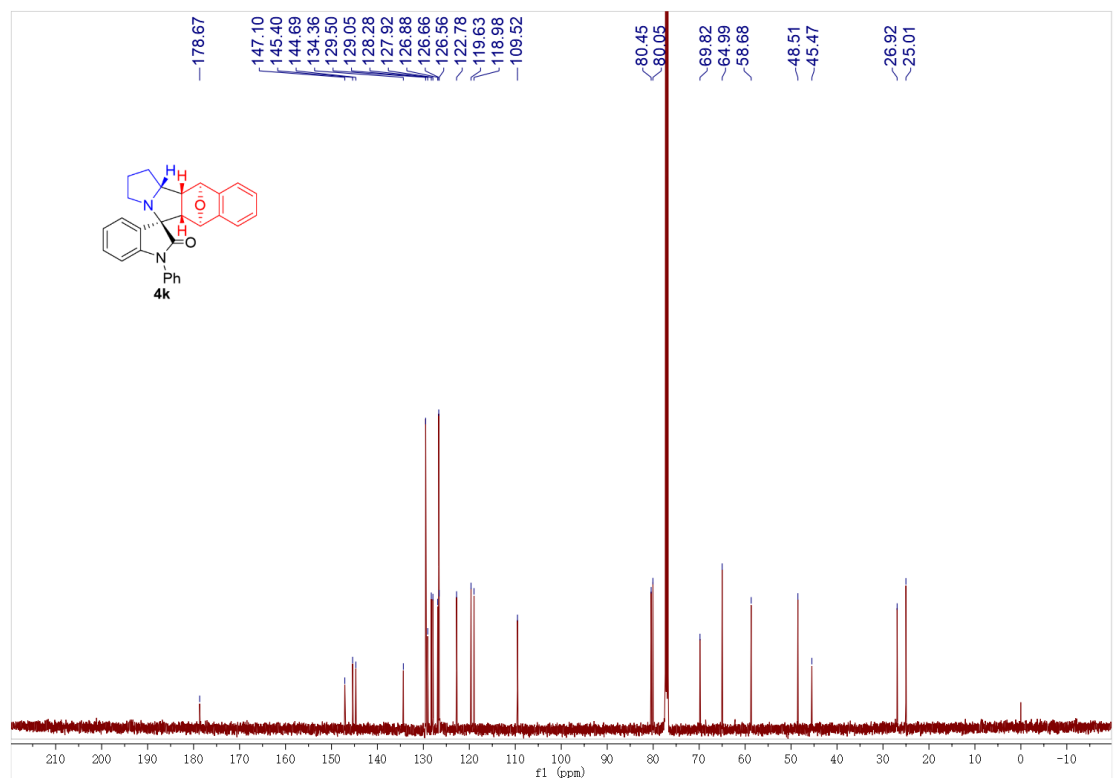

**<sup>1</sup>H NMR (400 MHz, CDCl<sub>3</sub>), <sup>13</sup>C NMR (125 MHz, CDCl<sub>3</sub>) spectrum of 4k**

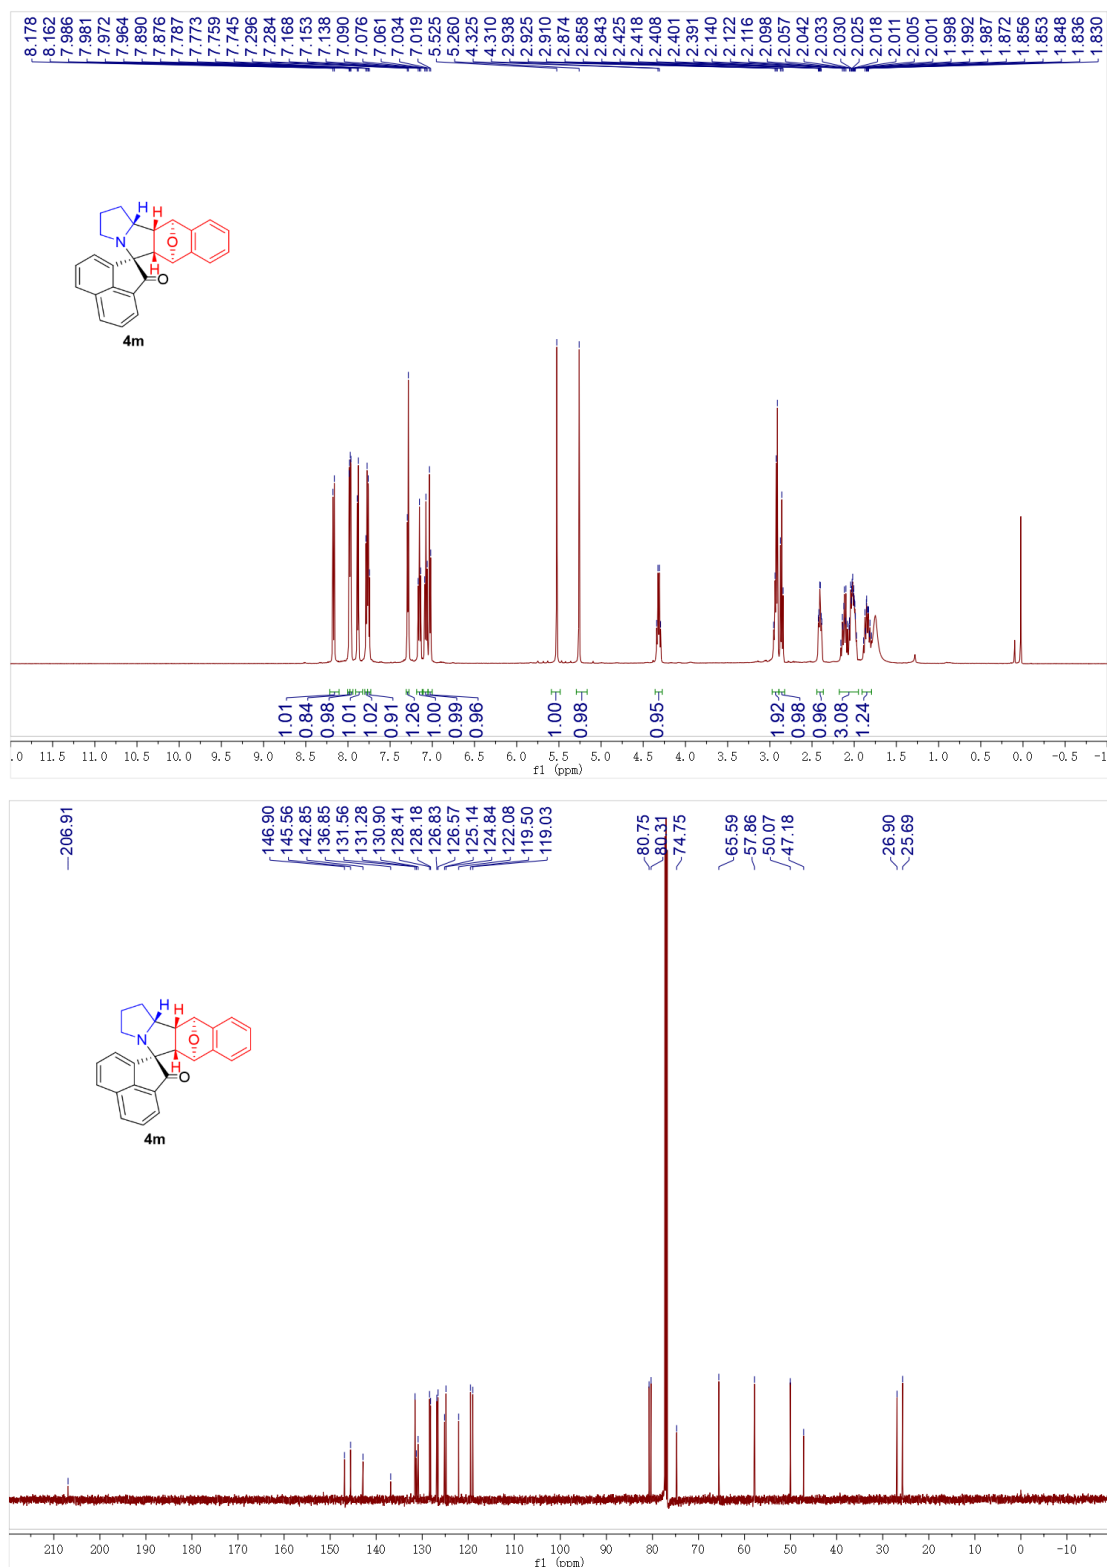

**<sup>1</sup>H NMR (500 MHz, CDCl<sub>3</sub>), <sup>13</sup>C NMR (125 MHz, CDCl<sub>3</sub>) spectrum of 4m**

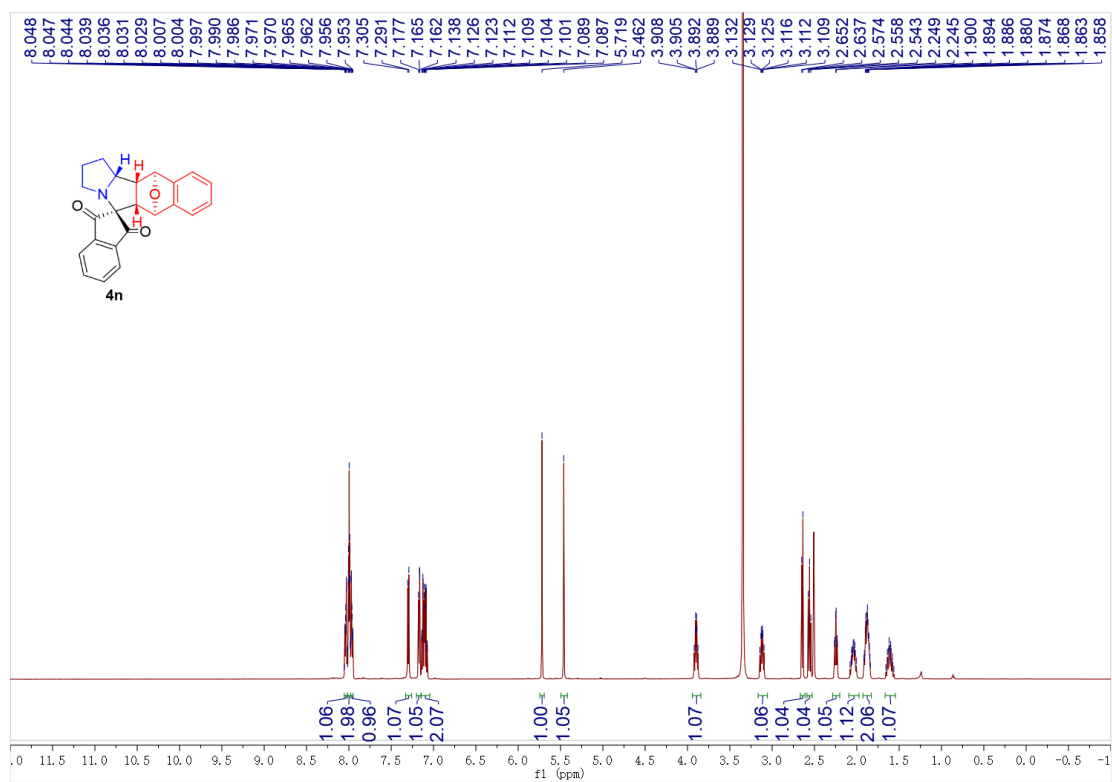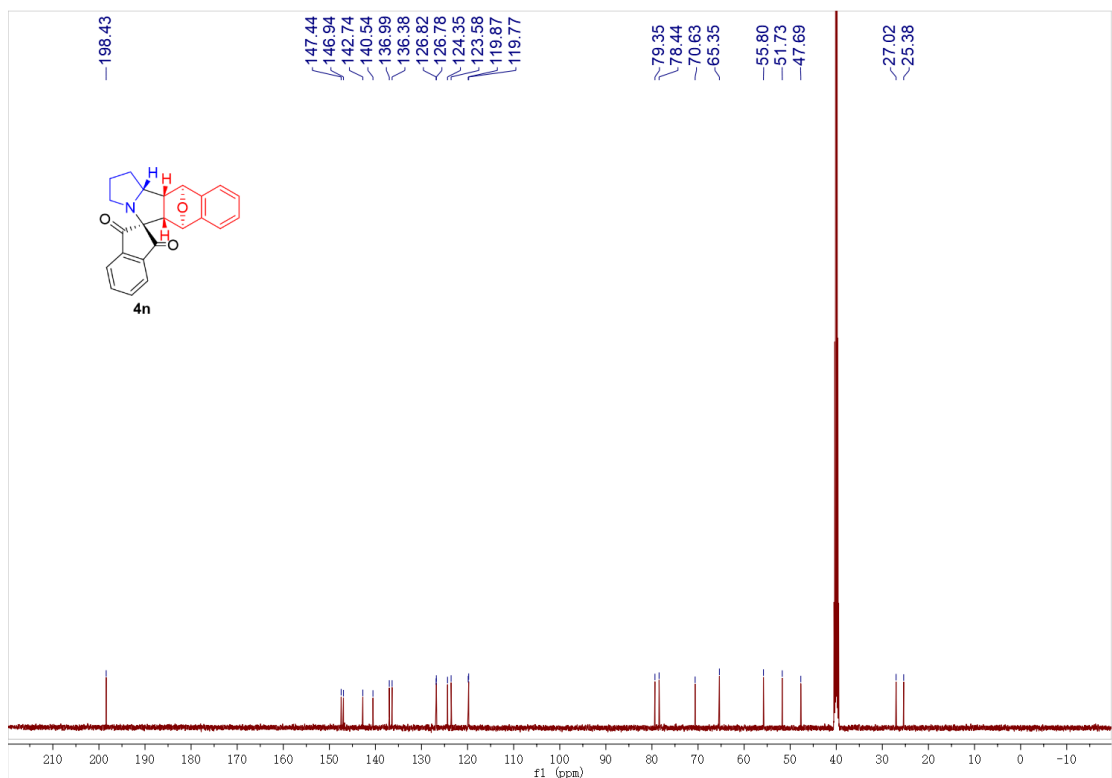

**<sup>1</sup>H NMR (500 MHz, DMSO-*d*<sub>6</sub>), <sup>13</sup>C NMR (125 MHz, DMSO-*d*<sub>6</sub>) spectrum of 4n**

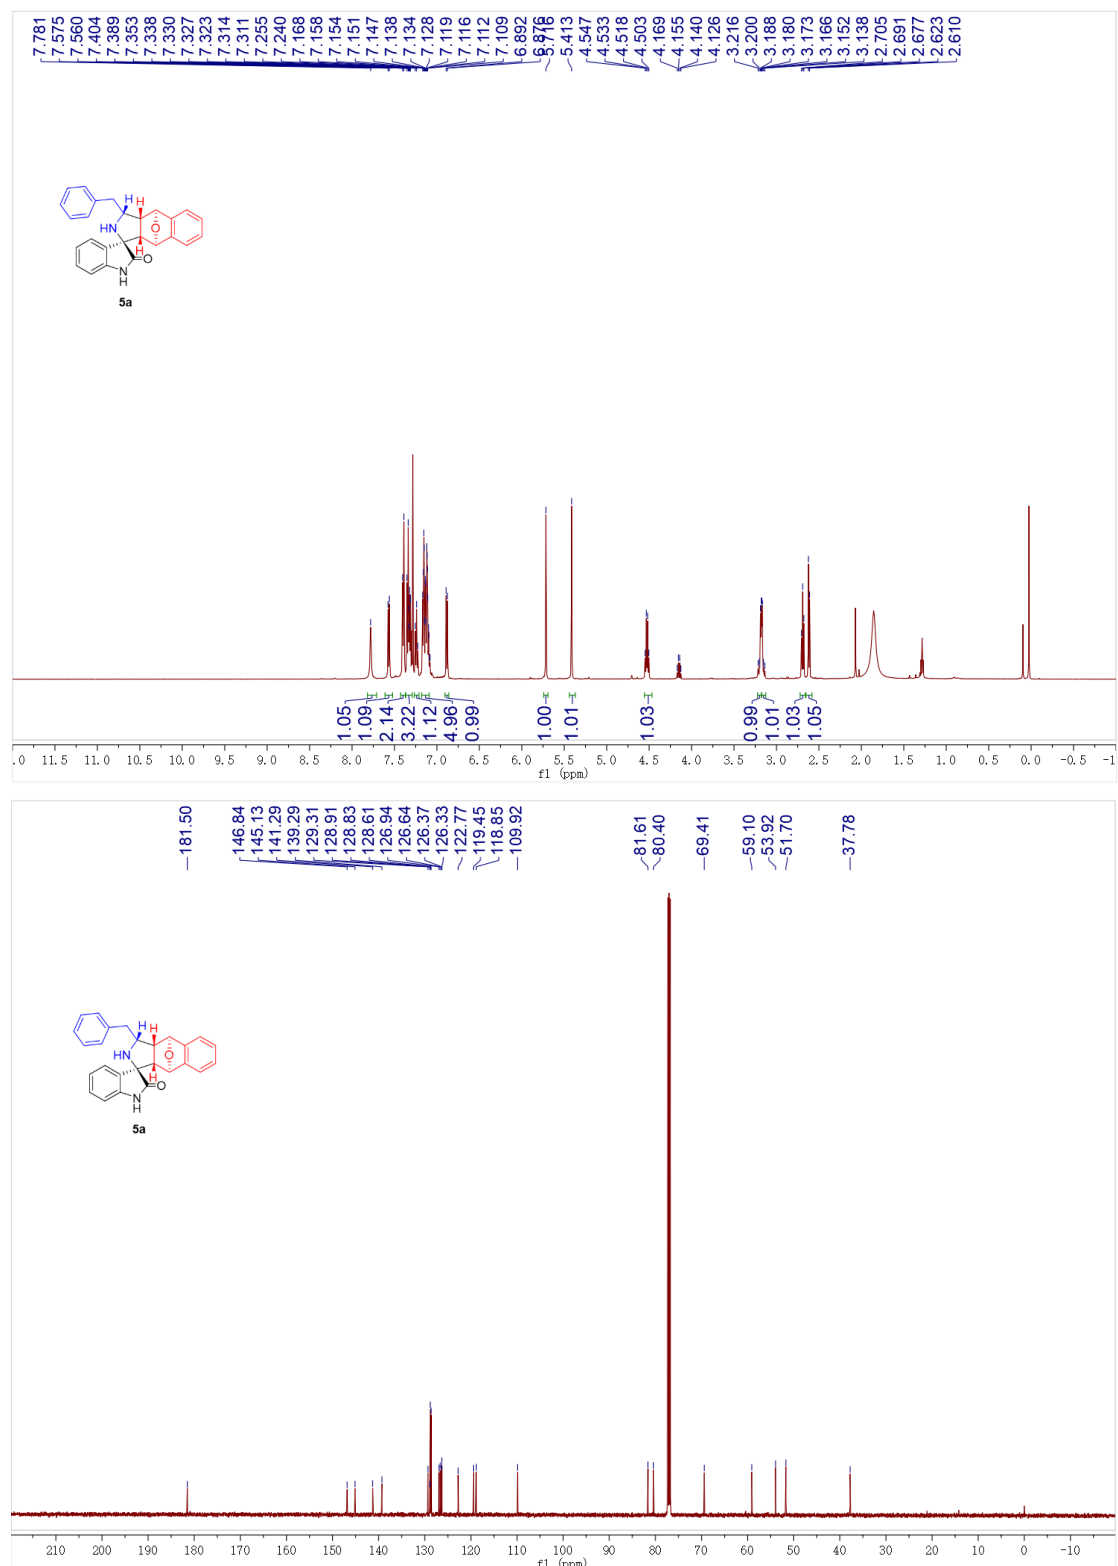

**<sup>1</sup>H NMR (500 MHz, CDCl<sub>3</sub>), <sup>13</sup>C NMR (125 MHz, CDCl<sub>3</sub>) spectrum of 5a**

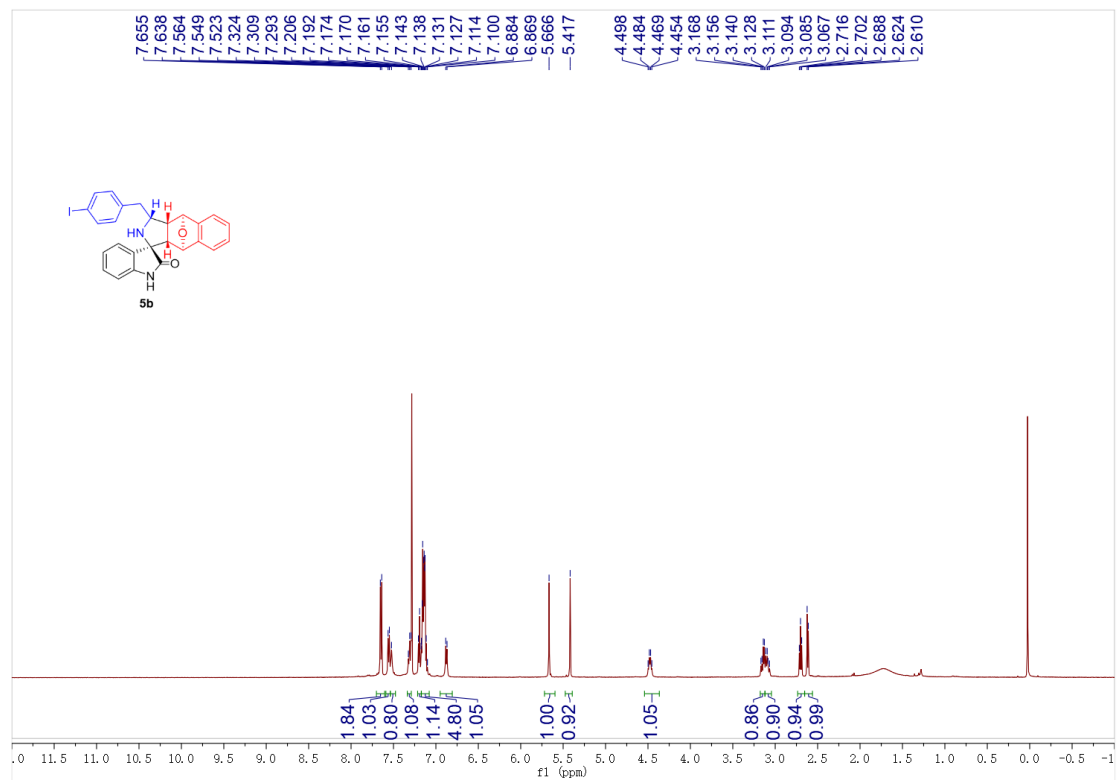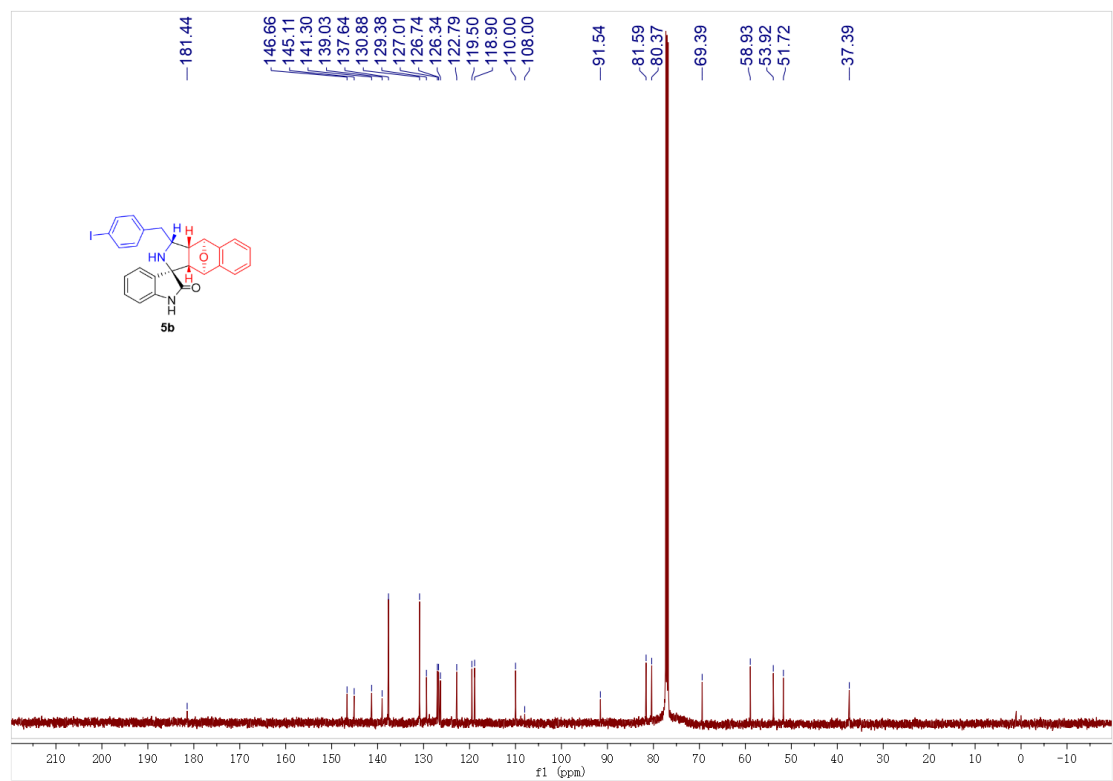

**<sup>1</sup>H NMR (500 MHz, CDCl<sub>3</sub>), <sup>13</sup>C NMR (125 MHz, CDCl<sub>3</sub>) spectrum of **5b****



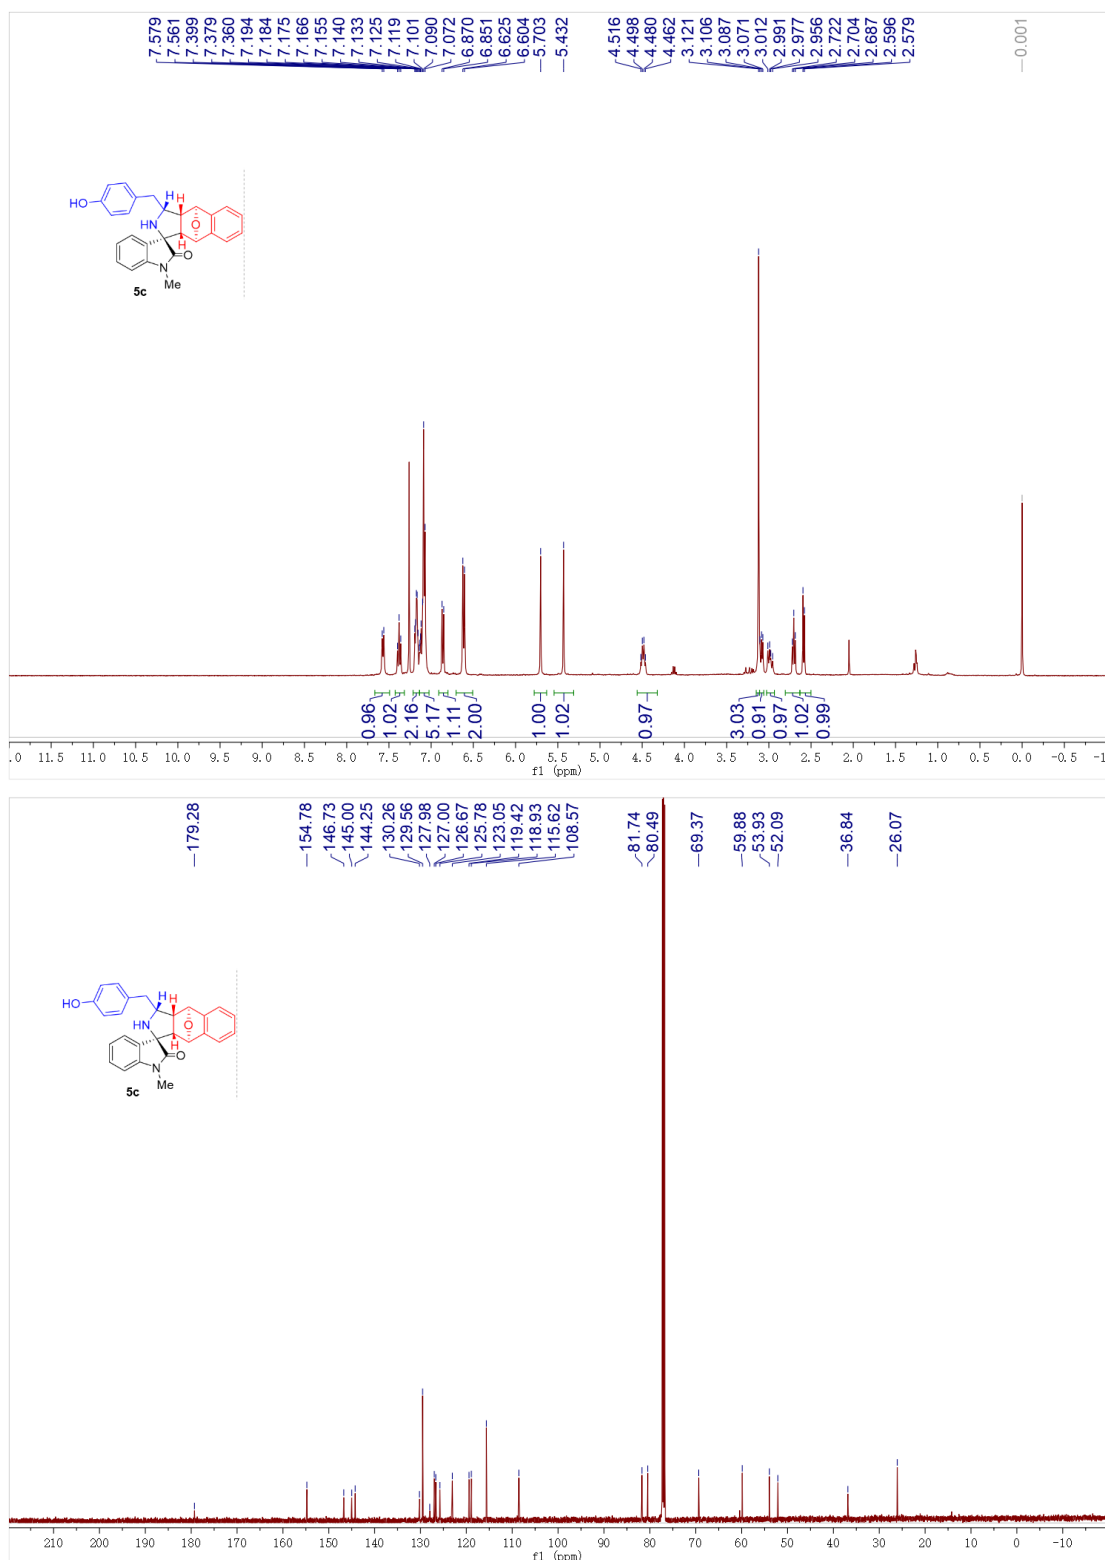

**<sup>1</sup>H NMR (400 MHz, CDCl<sub>3</sub>), <sup>13</sup>C NMR (125 MHz, CDCl<sub>3</sub>) spectrum of 5c**

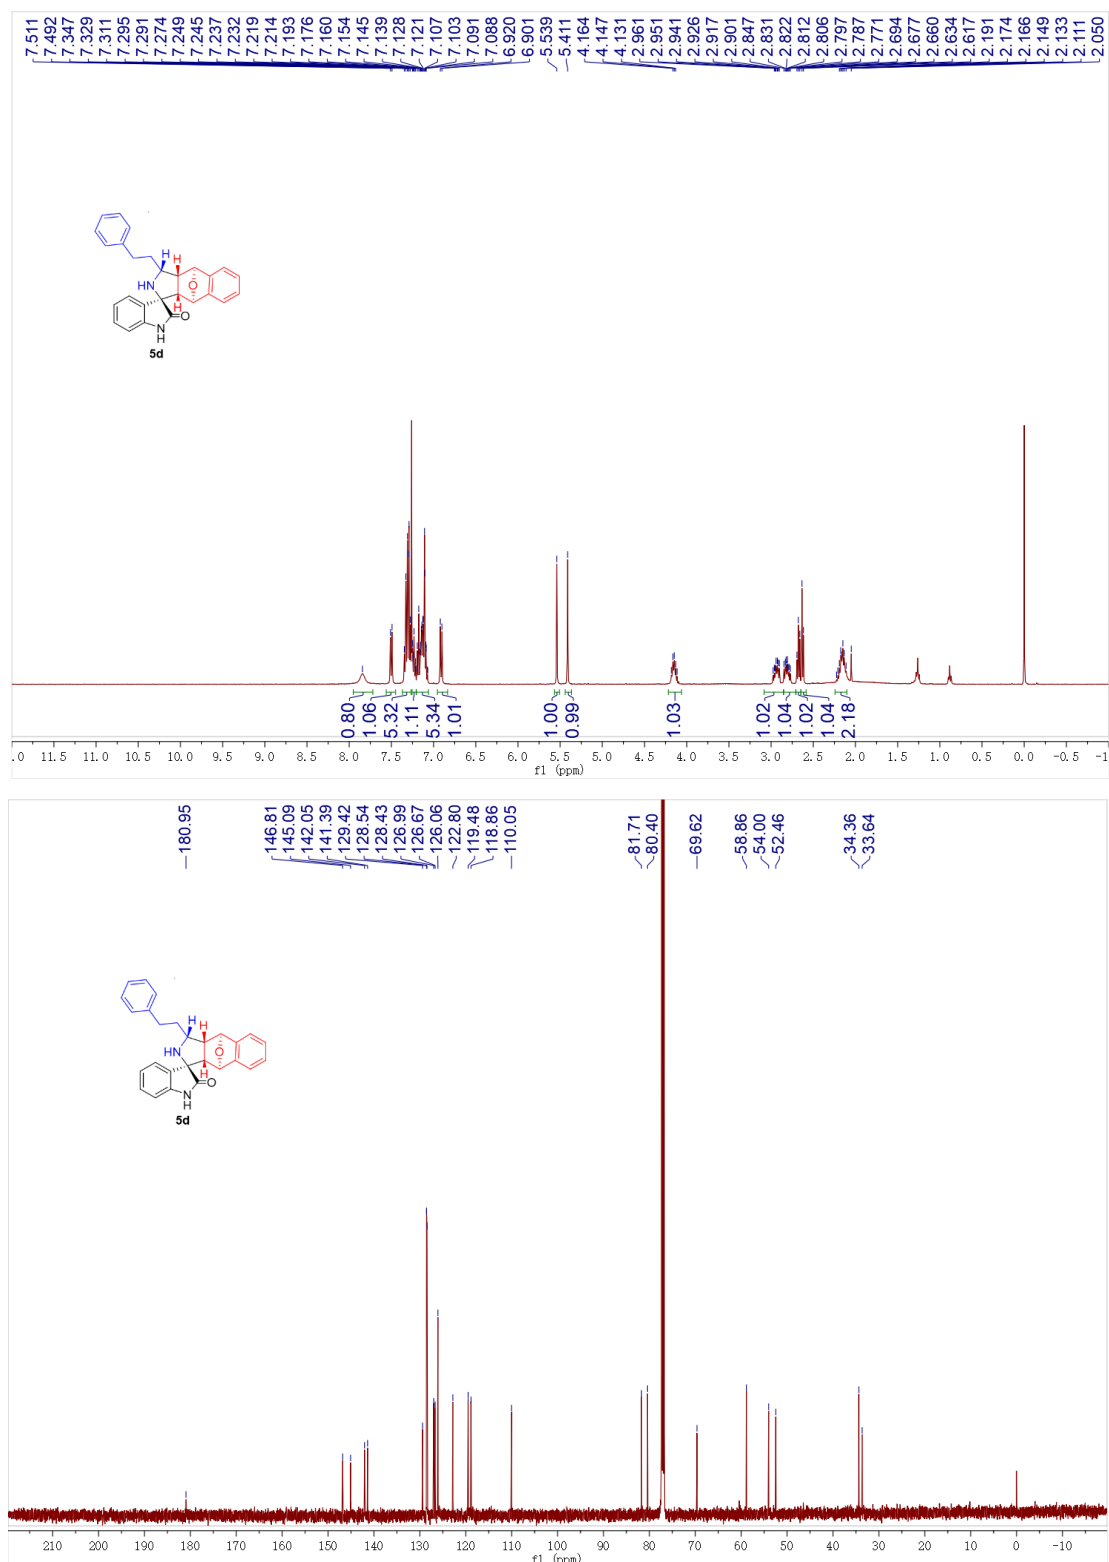

**<sup>1</sup>H NMR (400 MHz, CDCl<sub>3</sub>), <sup>13</sup>C NMR (125 MHz, CDCl<sub>3</sub>) spectrum of 5d**

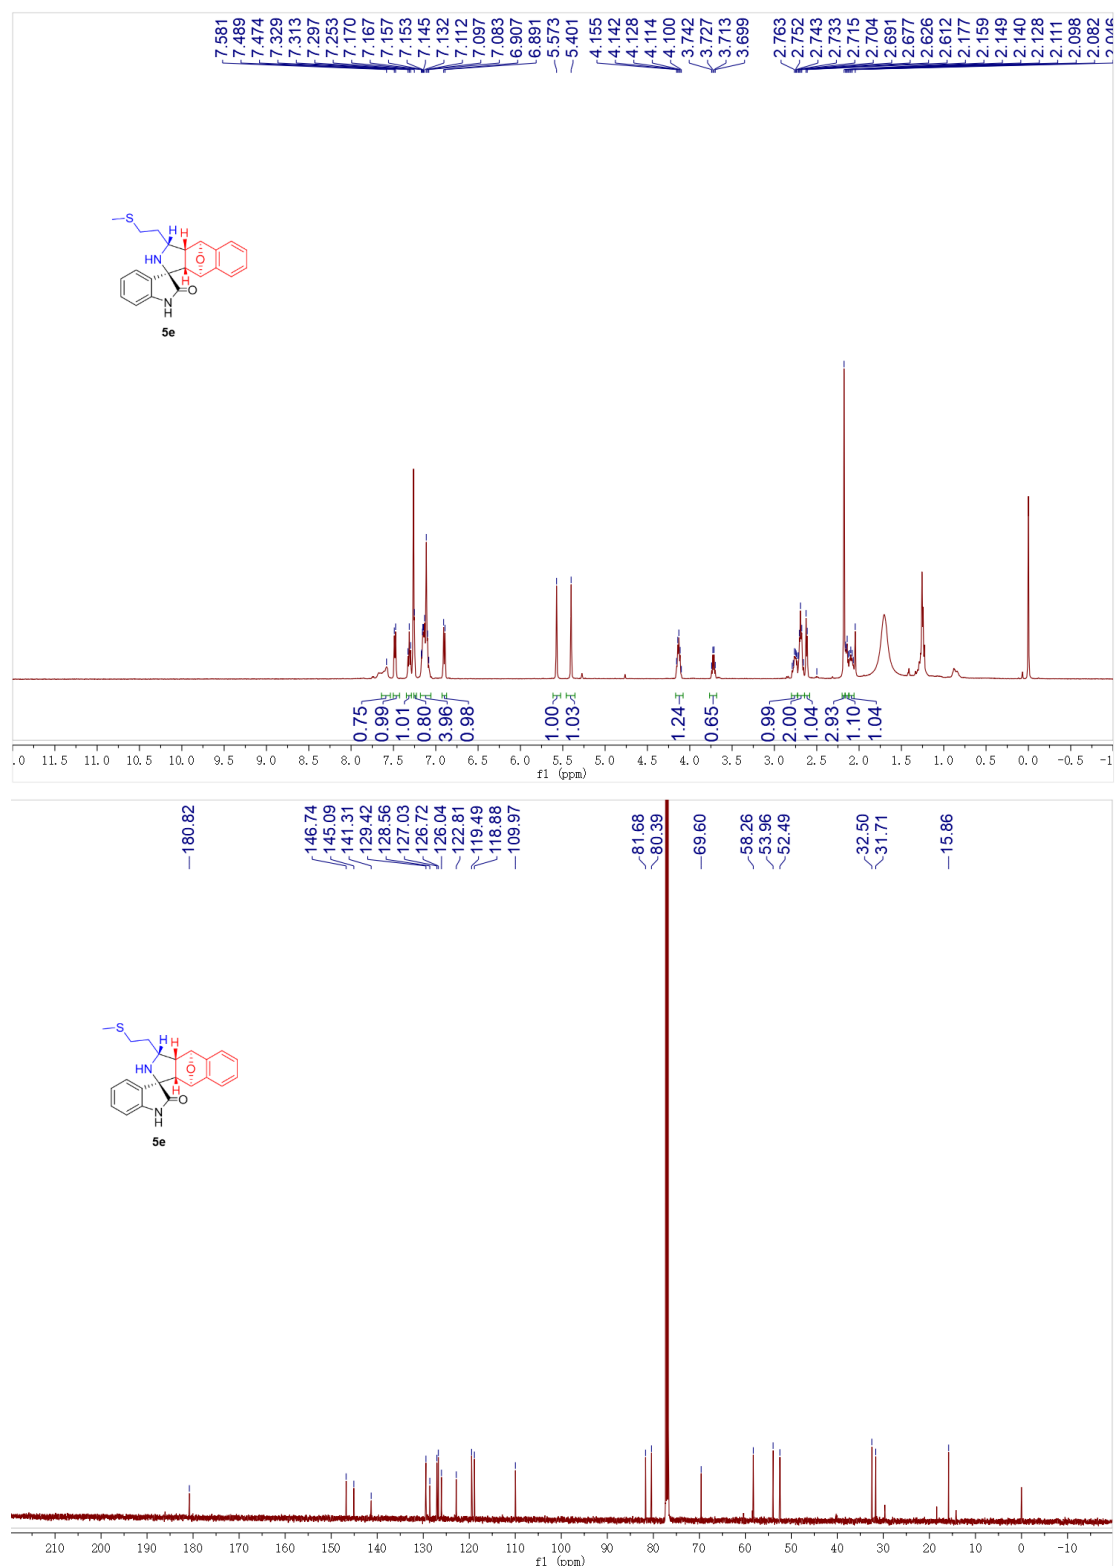

**<sup>1</sup>H NMR (500 MHz, CDCl<sub>3</sub>), <sup>13</sup>C NMR (125 MHz, CDCl<sub>3</sub>) spectrum of 5e**

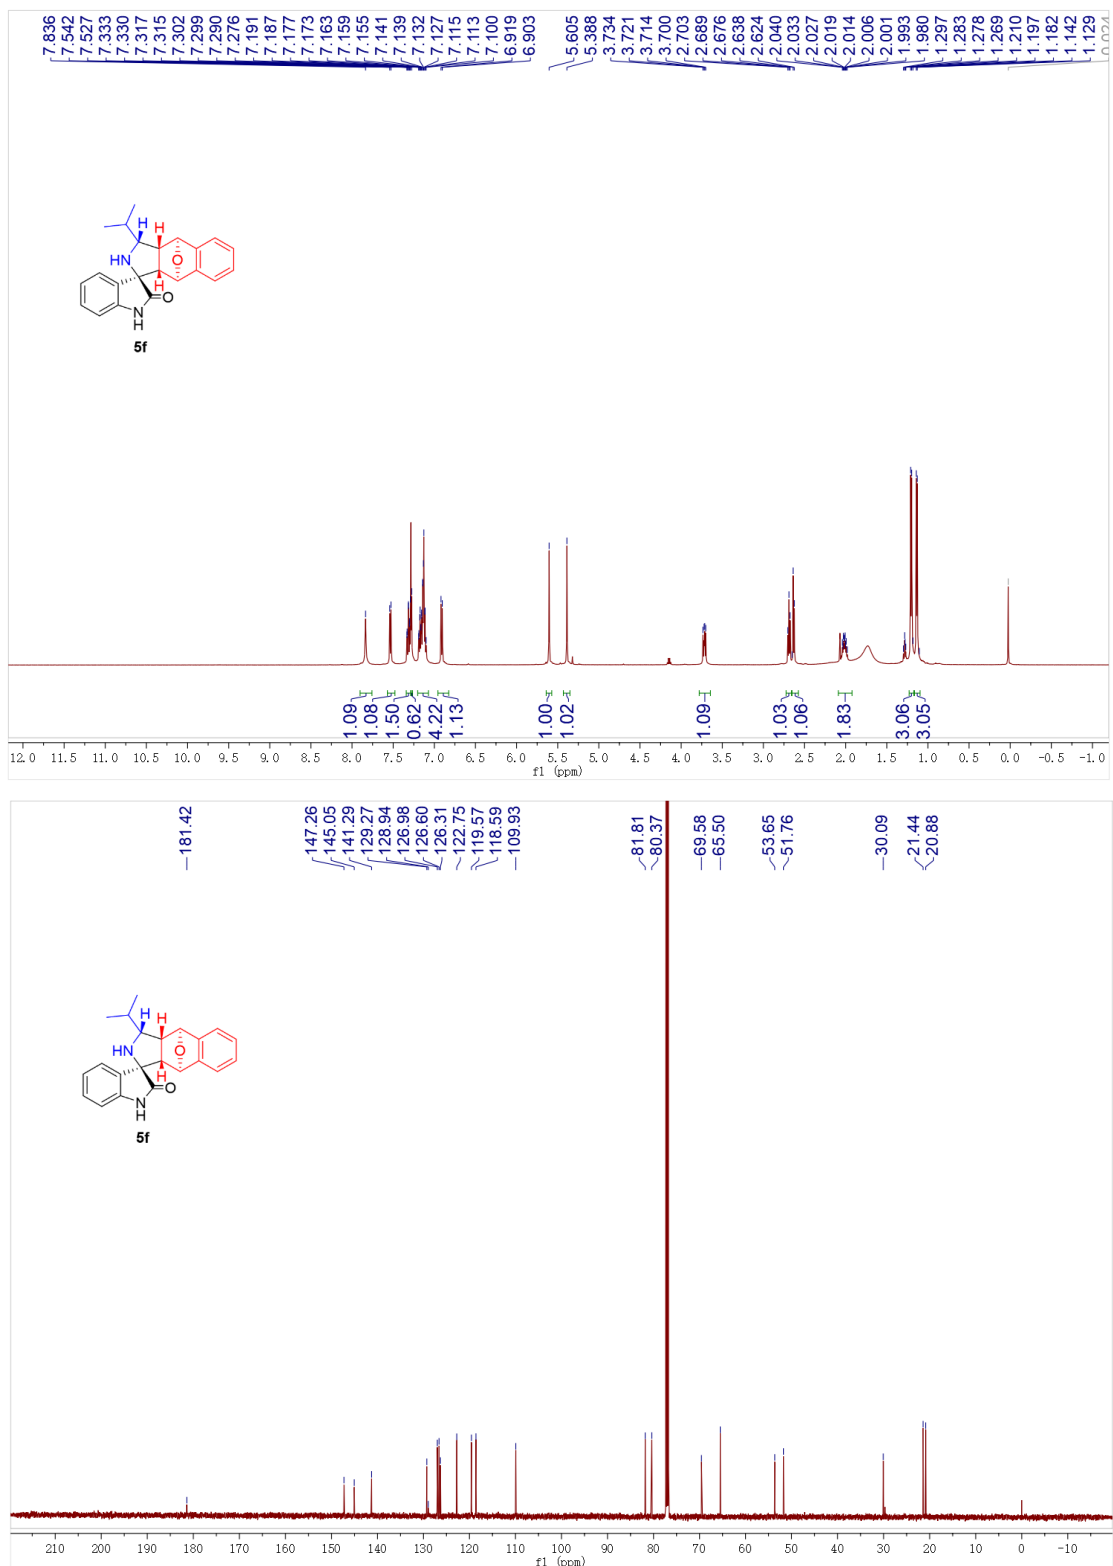

**<sup>1</sup>H NMR (500 MHz, CDCl<sub>3</sub>), <sup>13</sup>C NMR (125 MHz, CDCl<sub>3</sub>) spectrum of 5f**

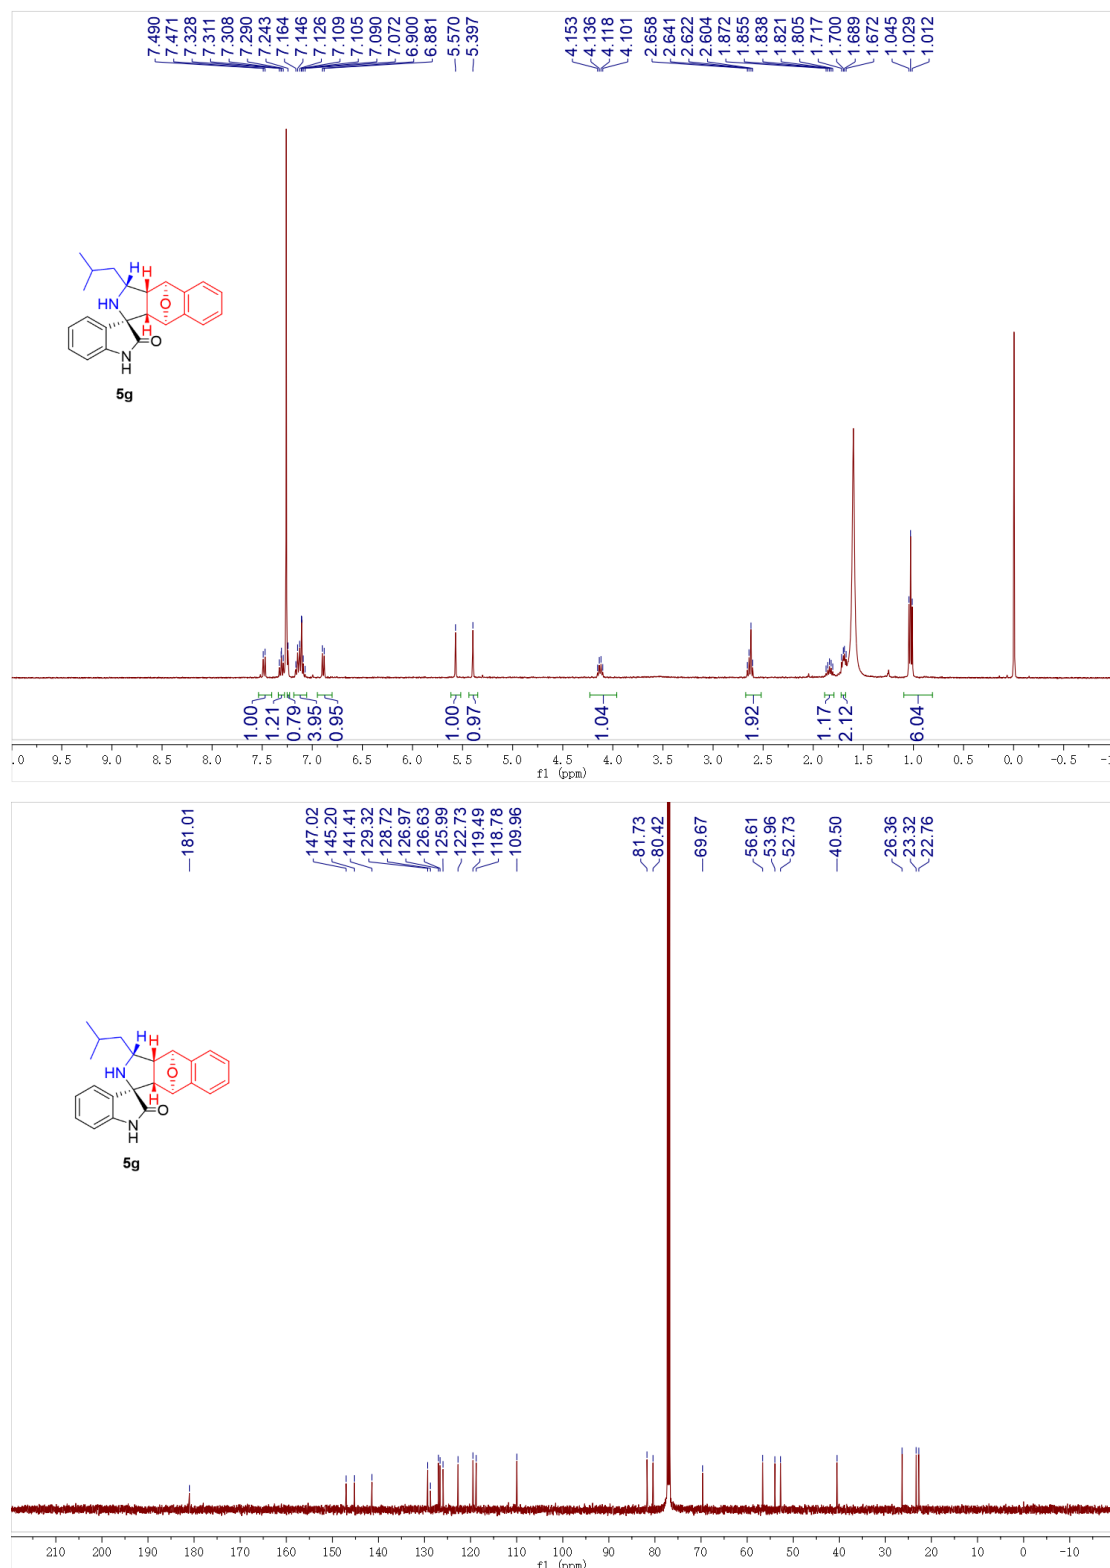

**<sup>1</sup>H NMR (400 MHz, CDCl<sub>3</sub>), <sup>13</sup>C NMR (125 MHz, CDCl<sub>3</sub>) spectrum of 5g**

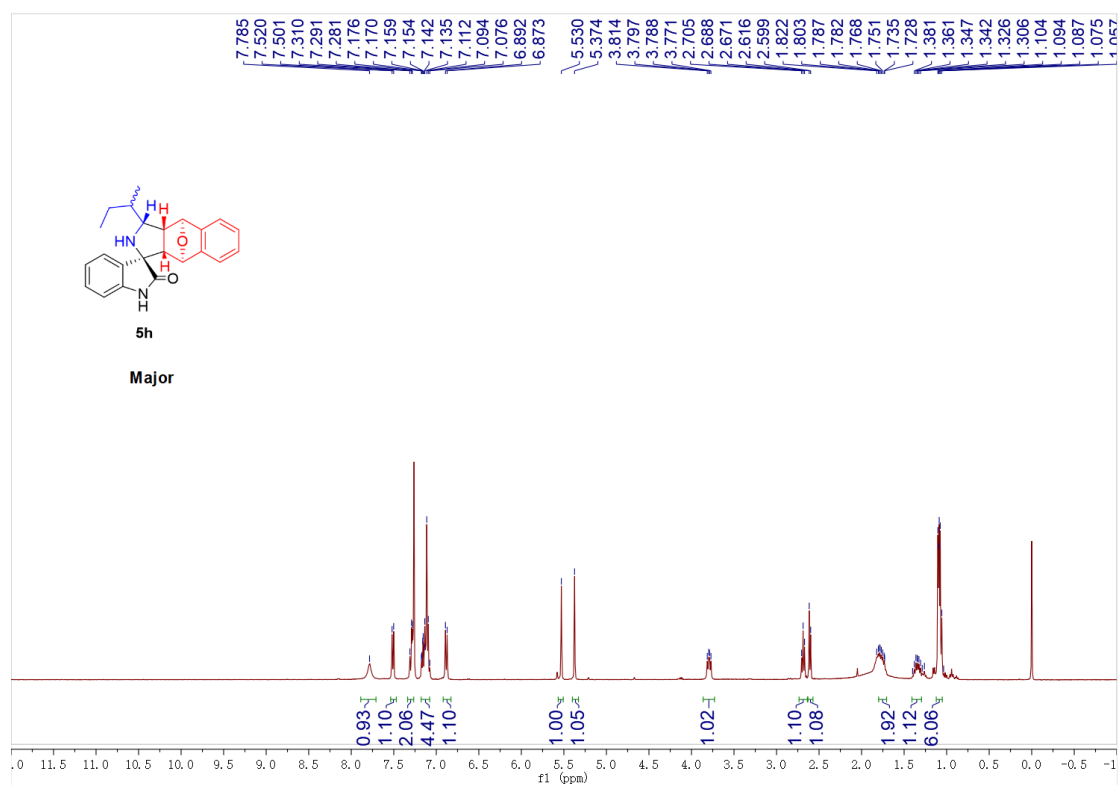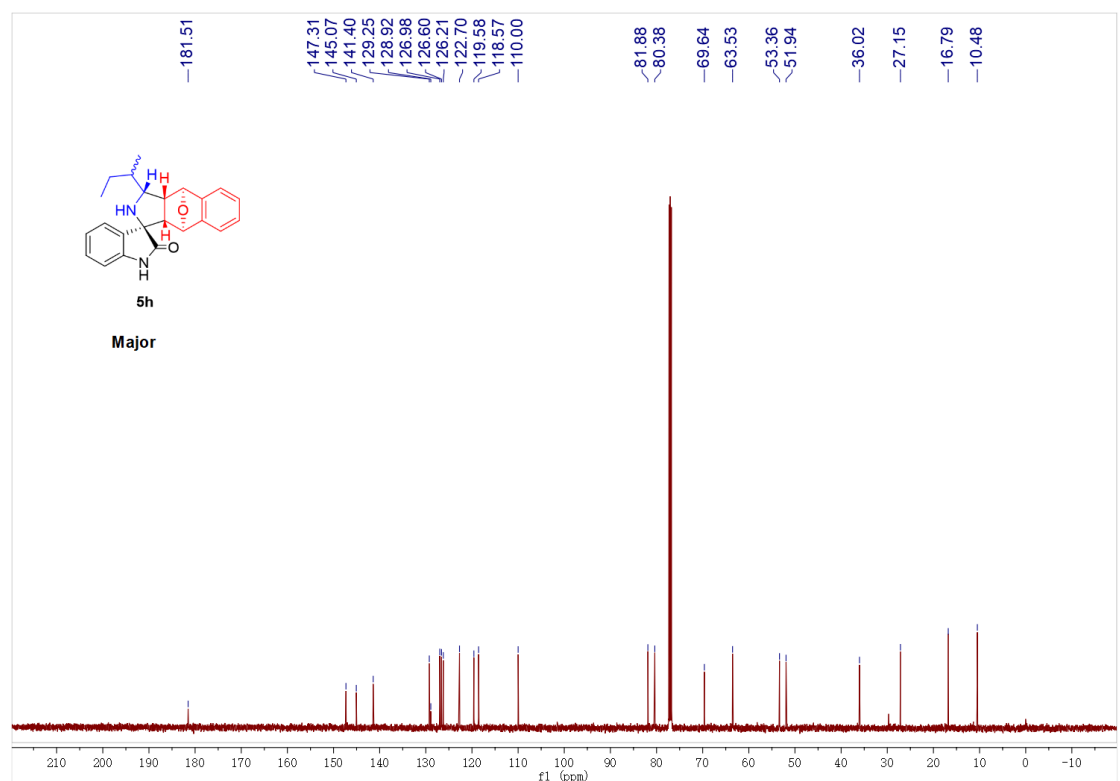

**$^1\text{H}$  NMR (400 MHz,  $\text{CDCl}_3$ ),  $^{13}\text{C}$  NMR (125 MHz,  $\text{CDCl}_3$ ) spectrum of 5h**

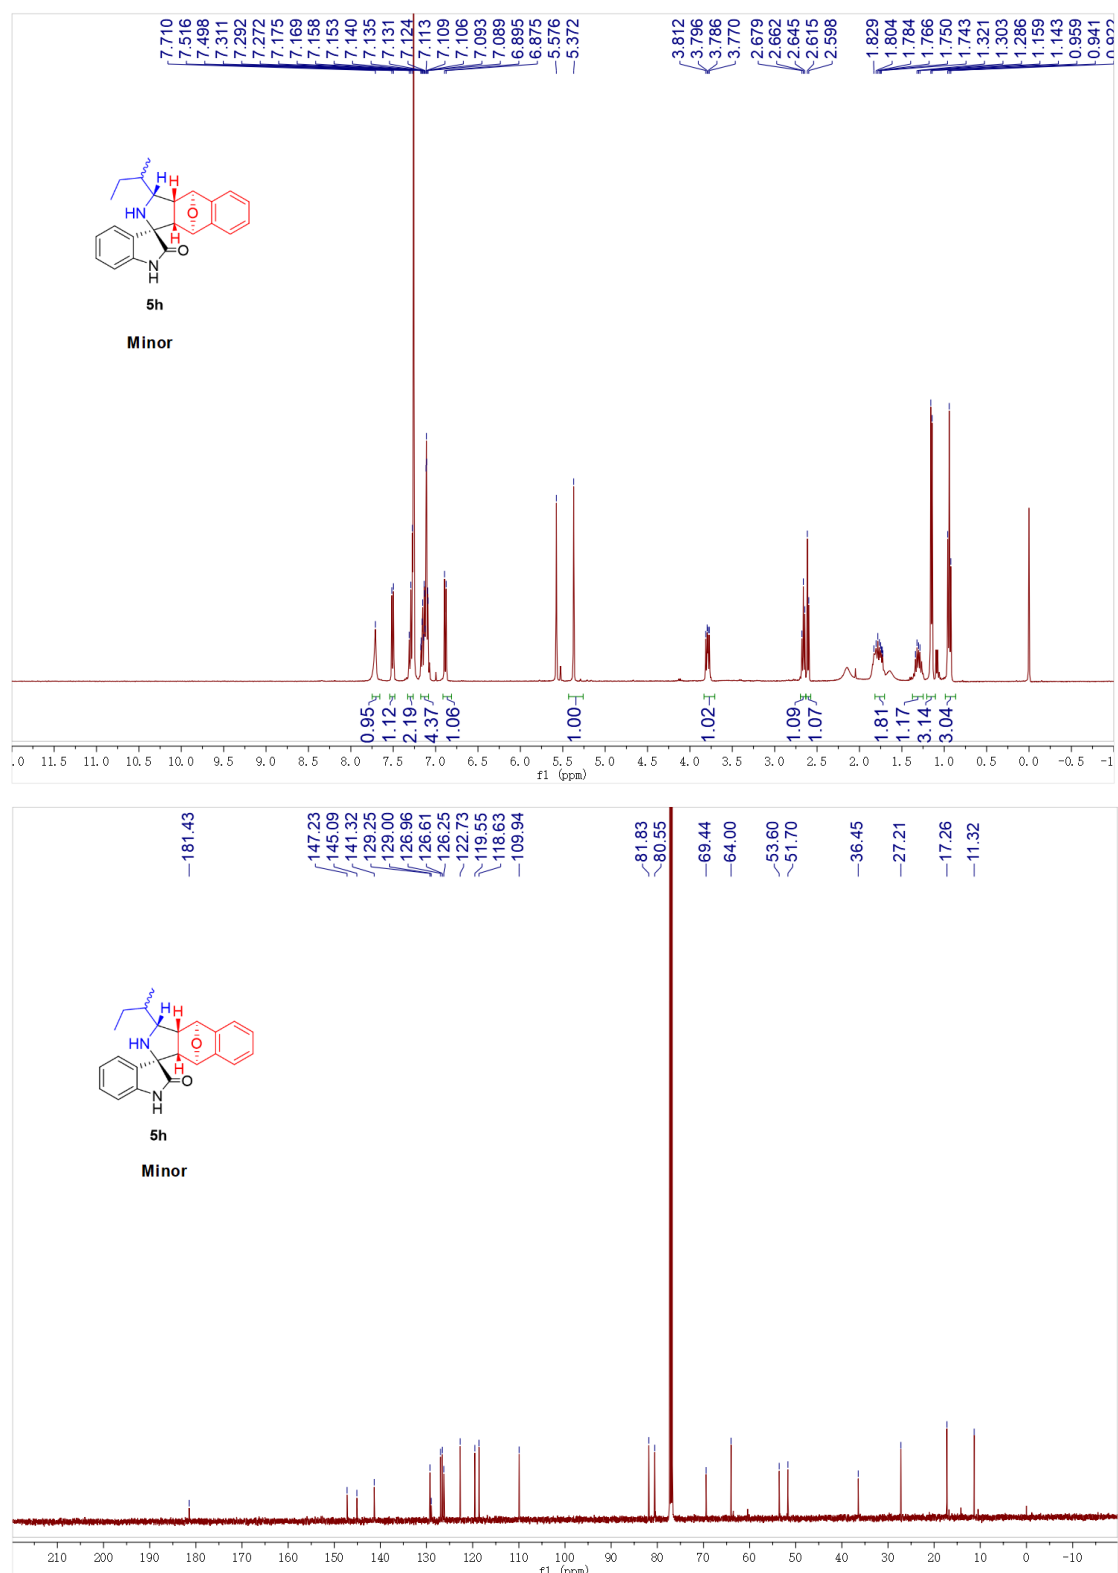

**<sup>1</sup>H NMR (400 MHz, CDCl<sub>3</sub>), <sup>13</sup>C NMR (125 MHz, CDCl<sub>3</sub>) spectrum of 5h**

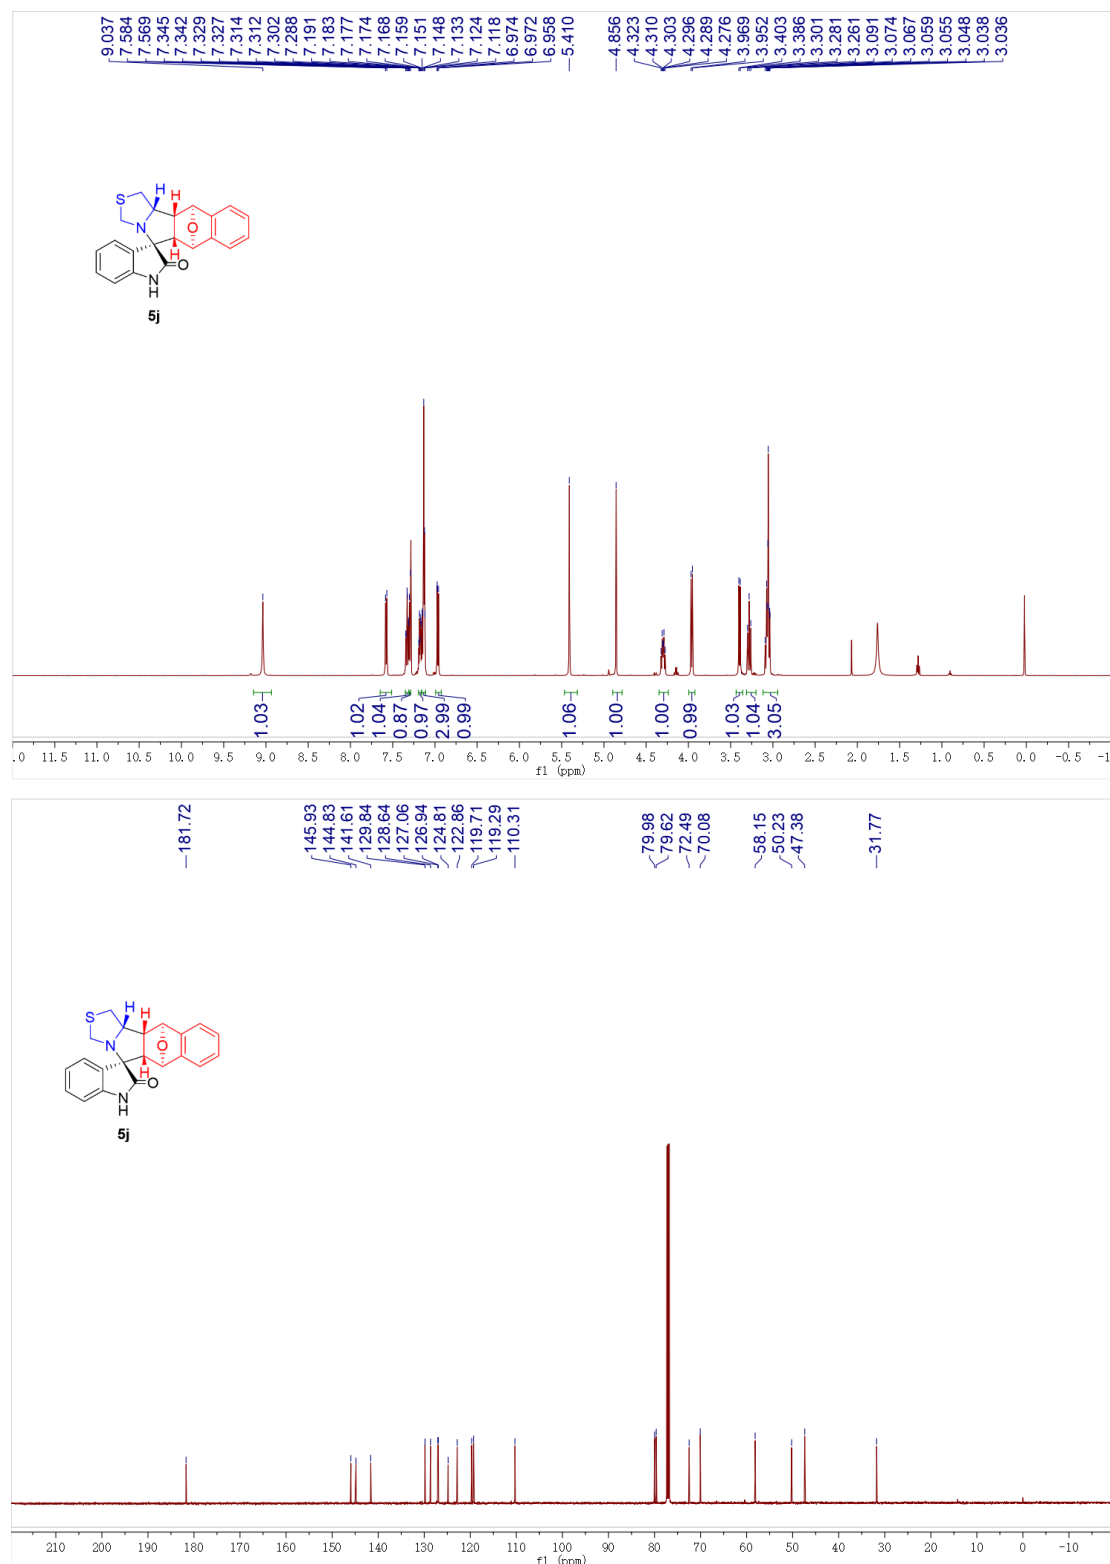

**<sup>1</sup>H NMR (500 MHz, CDCl<sub>3</sub>), <sup>13</sup>C NMR (125 MHz, CDCl<sub>3</sub>) spectrum of **5j****



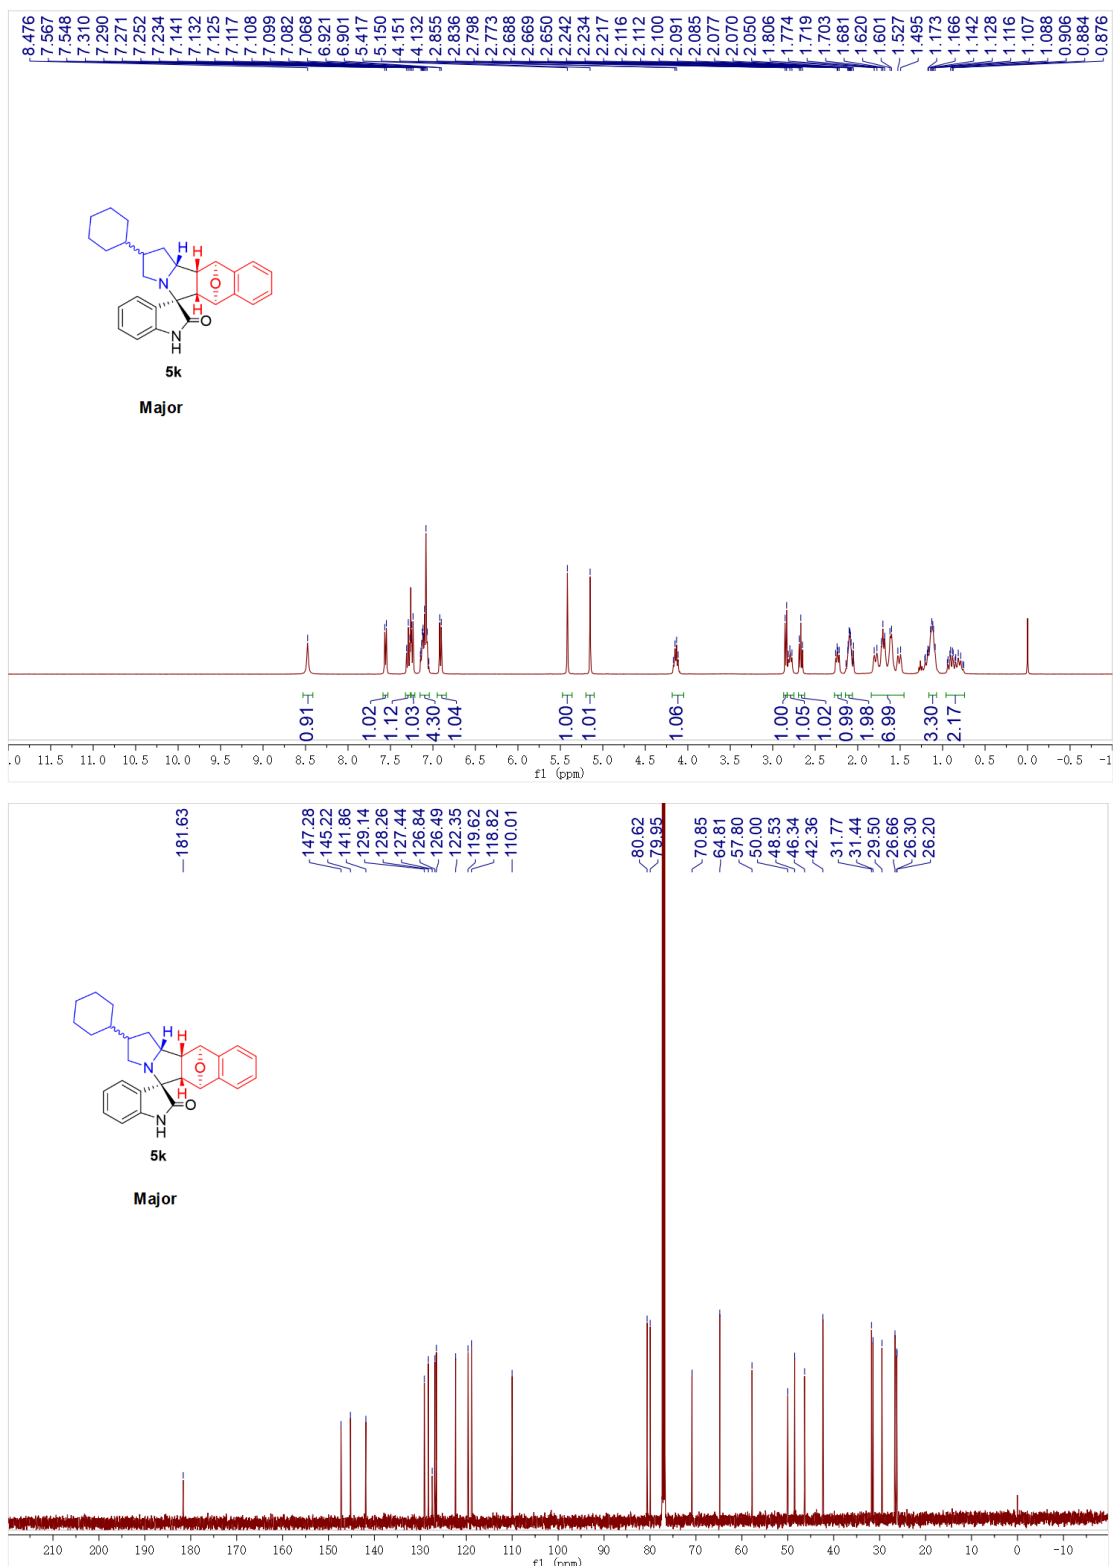

**<sup>1</sup>H NMR (400 MHz, CDCl<sub>3</sub>), <sup>13</sup>C NMR (125 MHz, CDCl<sub>3</sub>) spectrum of 5k**

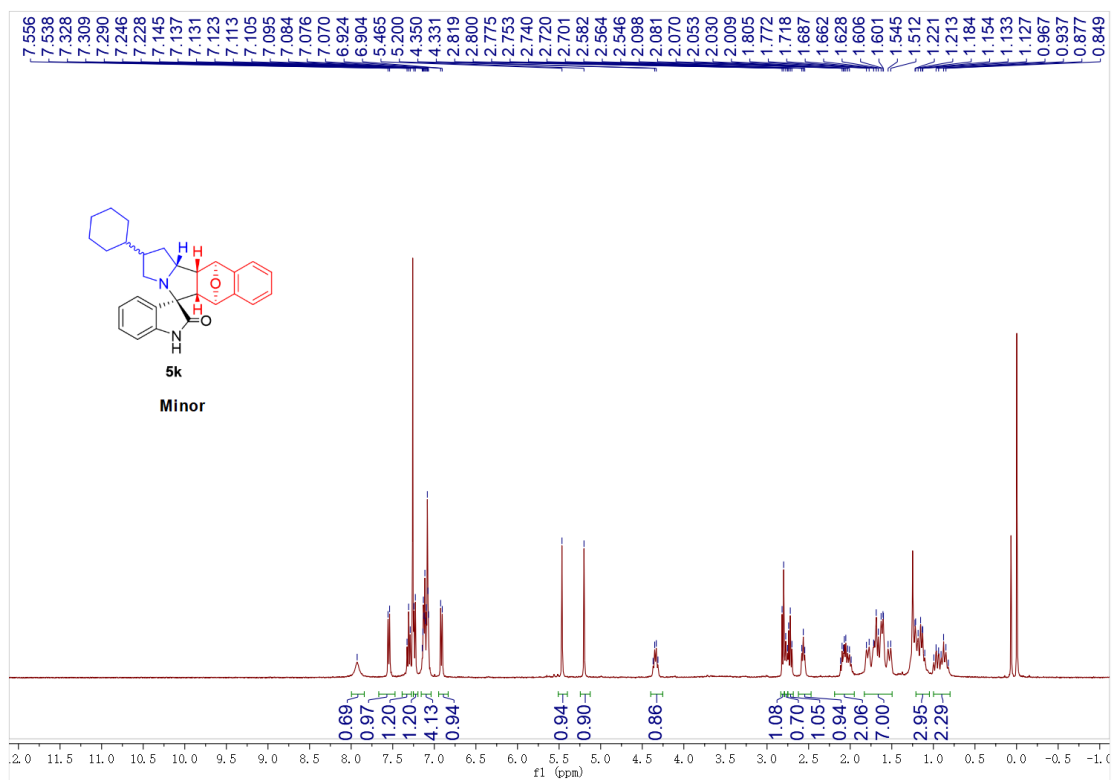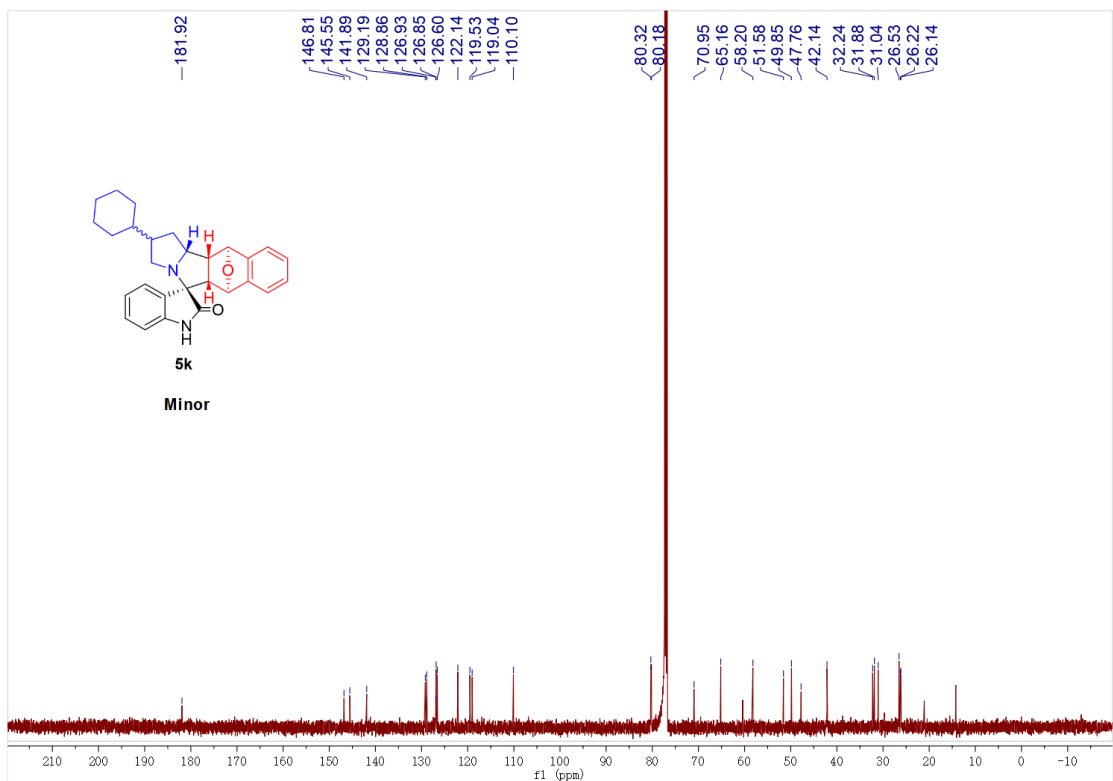

**<sup>1</sup>H NMR (400 MHz, CDCl<sub>3</sub>), <sup>13</sup>C NMR (125 MHz, CDCl<sub>3</sub>) spectrum of 5k**

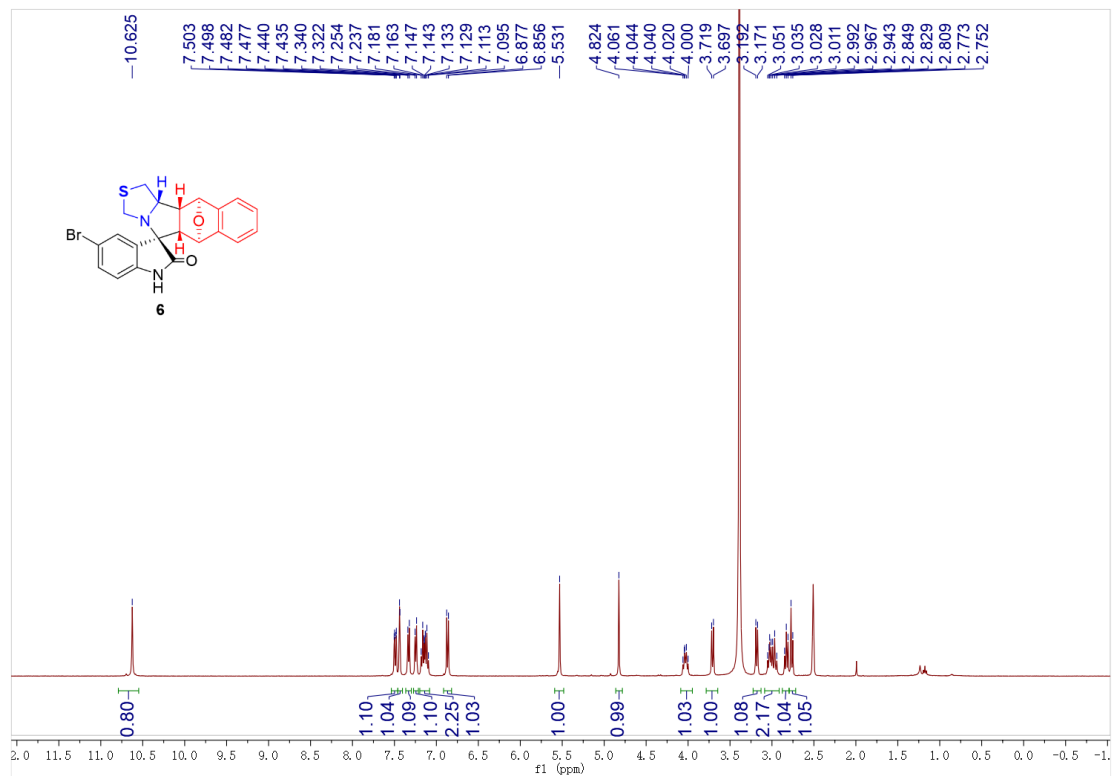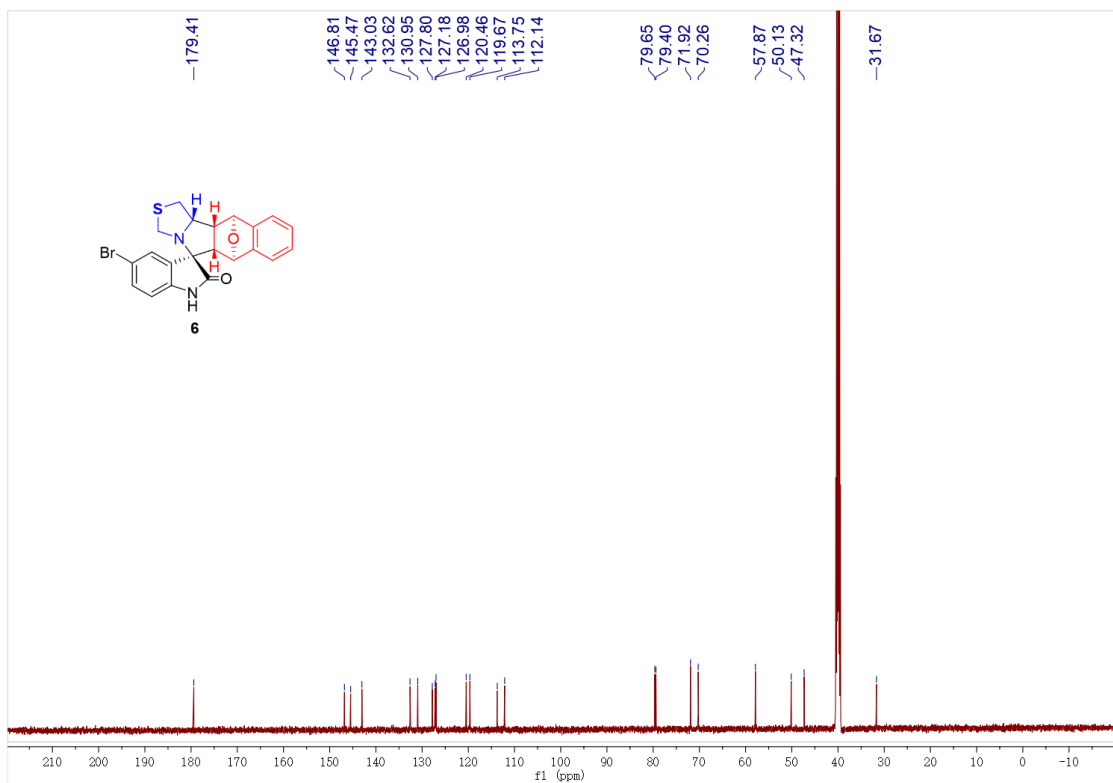

**<sup>1</sup>H NMR (400 MHz, DMSO-*d*<sub>6</sub>), <sup>13</sup>C NMR (125 MHz, DMSO-*d*<sub>6</sub>) spectrum of 6**

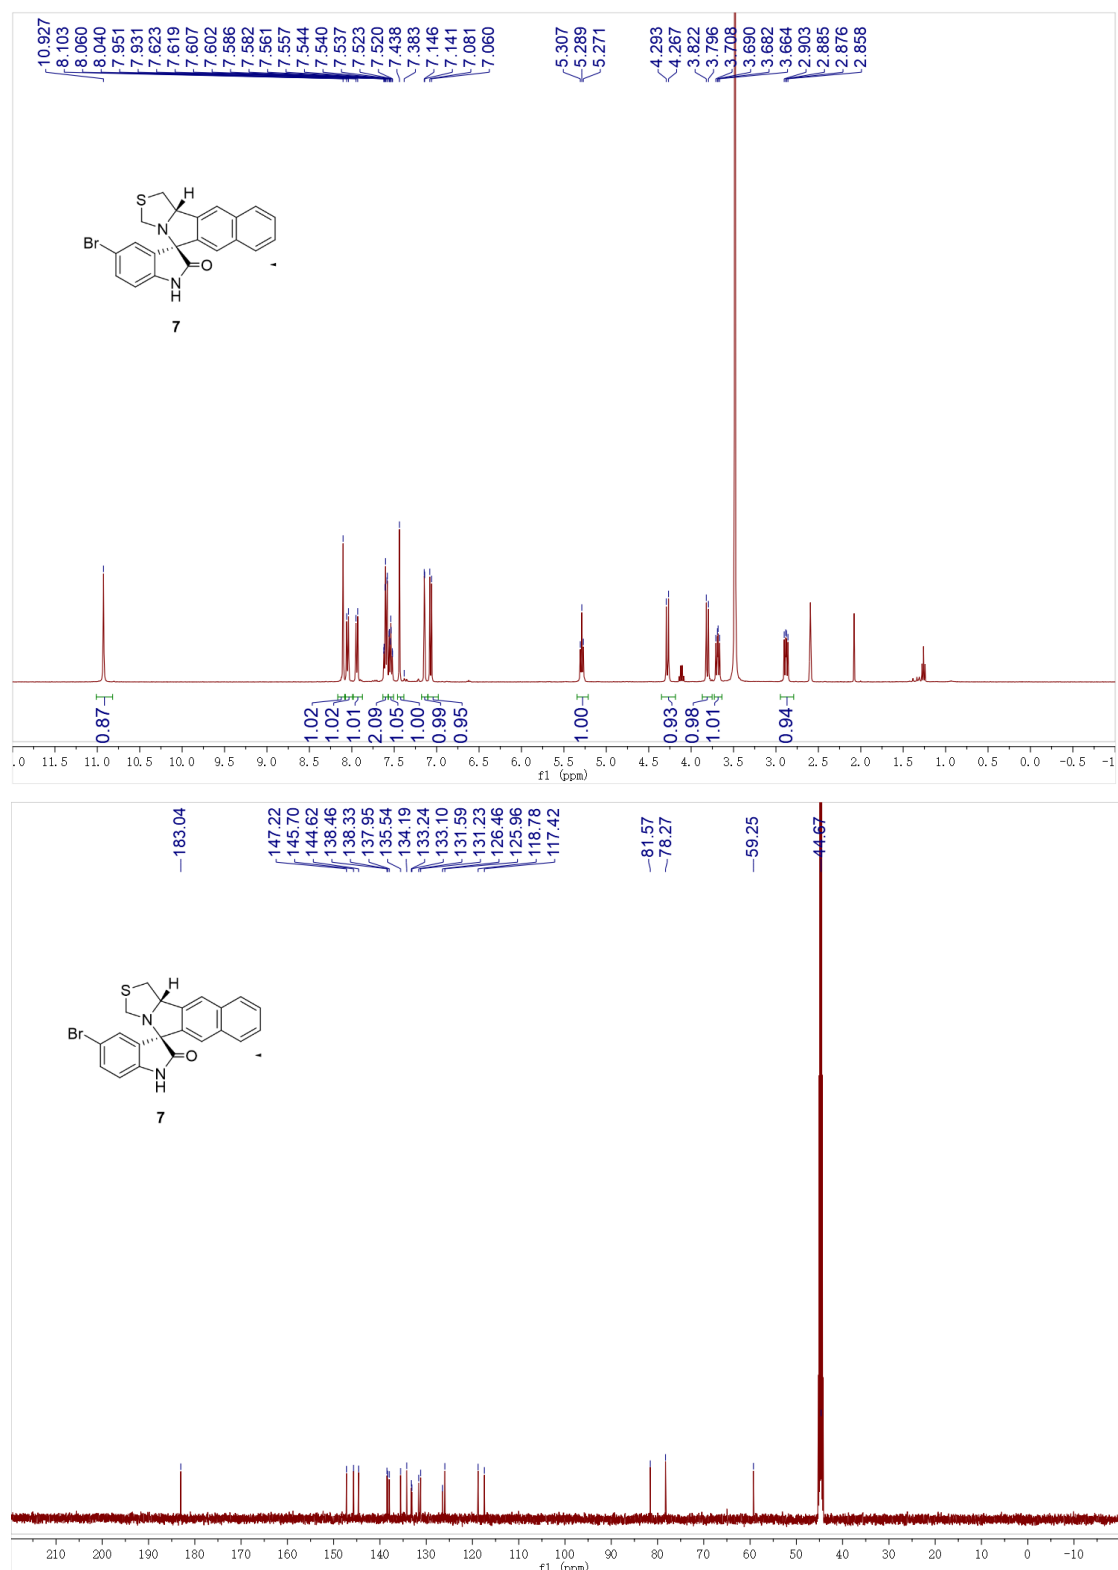

**<sup>1</sup>H NMR (400 MHz, DMSO-*d*<sub>6</sub>), <sup>13</sup>C NMR (125 MHz, DMSO-*d*<sub>6</sub>) spectrum of 7**

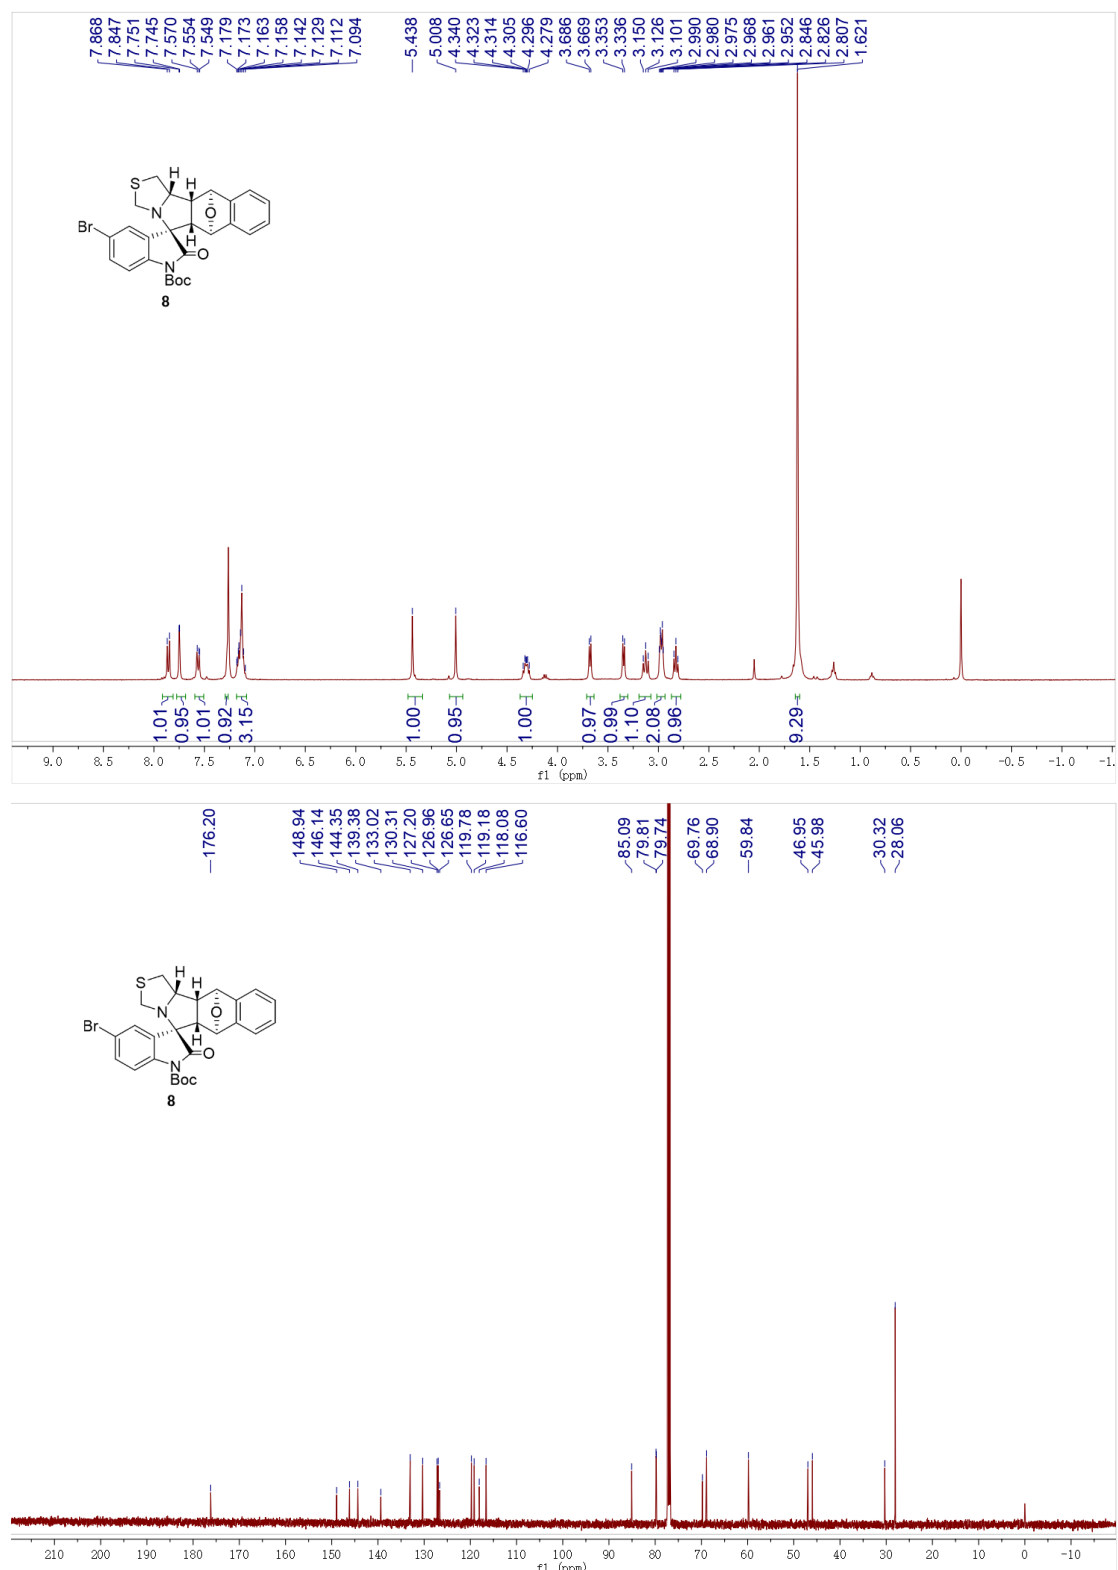

**<sup>1</sup>H NMR (400 MHz, CDCl<sub>3</sub>), <sup>13</sup>C NMR (125 MHz, CDCl<sub>3</sub>) spectrum of 8**

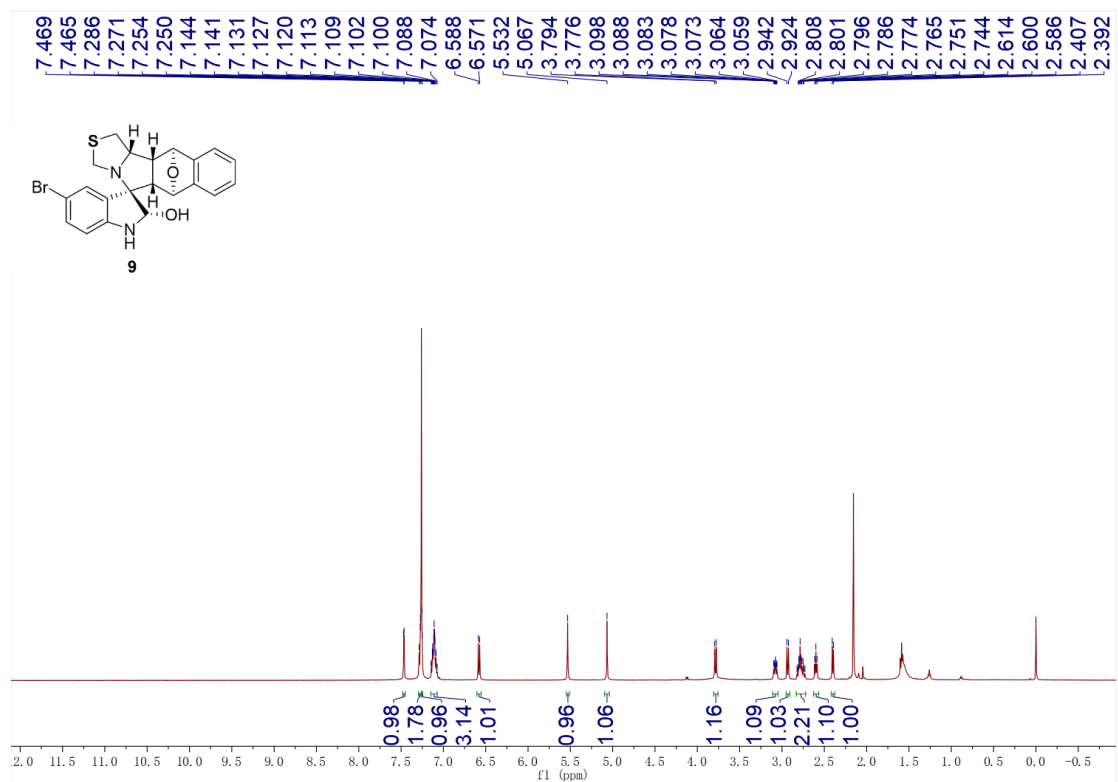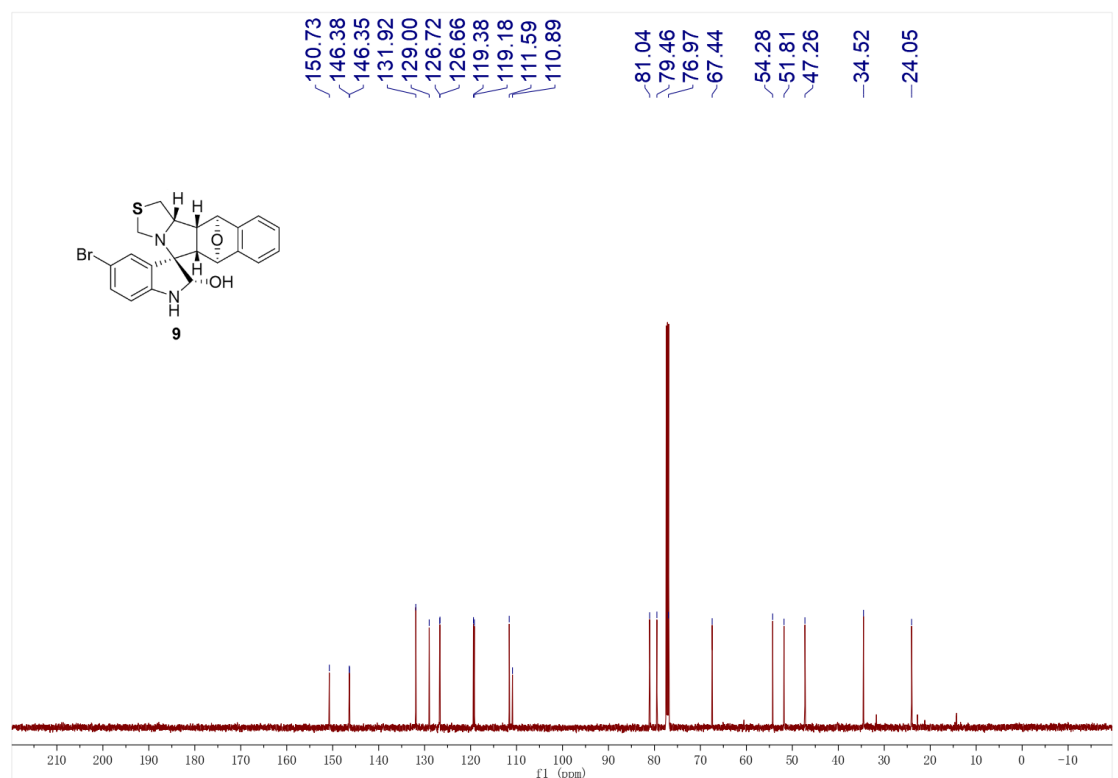

$^1\text{H}$  NMR (500 MHz,  $\text{CDCl}_3$ ),  $^{13}\text{C}$  NMR (125 MHz,  $\text{CDCl}_3$ ) spectrum of **9**
